# Supplementary material
Source: PubMed Central journal article supplement (PMC9552307)

# SUPPLEMENTARY MATERIAL

## SUPPLEMENTARY METHODS

### Differential expression analysis of RNA-seq data from discoidin domain receptor (DDR) animal models

Cell lines used in this analysis were previously described. NA13 was a murine C57B6 bladder cancer line <sup>1</sup> and T24 were human bladder cancer (BCa) cells <sup>2</sup>. RNA-seq analysis was done through the standard Illumina RNA-seq protocol. The sequenced reads were put into the STAR-RSEM RNA-seq data analysis pipeline <sup>3,4</sup> to quantify gene-level expression. We generated RNA-seq data from 4 *DDR1* overexpression and 4 Control mice. To this end, we used Rag2/Il2rg Double Knockout mice (TACONIC TRANSGENIC MODELS™) at 6-week of age as the host for tumor cell engraftment for these experiments. Tumor cells were allowed to engraft for 6 weeks before sacrifice for RNA isolation, library prep and RNA-seq. *DDR1* data were aligned with Human Genome GRCh38 version, while *DDR2* data were aligned with Mouse Genome 19 version. Read counts were normalized by TMM normalization method <sup>5</sup> and Negative Binomial test <sup>6</sup> was applied to identify differentially expressed genes (DEGs) of these comparisons including *DDR1* overexpression versus control and sh*DDR2* versus IgG control. False discovery rate (FDR) was estimated with Storey's method <sup>7</sup>. DEGs were selected with FDR<.05 and log2-fold-change ≥1.

### TCGA BCa sample selection

Out of 407 TCGA BCa patient records retrieved from the UCSC Xena browser <sup>8</sup>, we selected 259 sample data for further analysis. The samples which met the following criteria were excluded from our analysis: 1) stage other than T2-4; 2) variant histology (n=52, 42 squamous, 4 small cell/neuroendocrine, 2 micropapillary, 4 plasmacytoid), pure squamous cell carcinomas (n=3), squamous cell carcinoma of non-bladder origin (n=1) and adenocarcinoma (n=1); 3) prior

intravesical immunotherapy with Bacille Calmette-Guerin (n=35); 4) neoadjuvant chemotherapy (NAC) (n=12); and 5) low histological grade (n=21).

### **Subtype assignment of BCa tumor samples**

To assign the BCa tumor samples into one of 5 molecular subtypes, we used the consensus MIBC R package (<https://github.com/cit-bioinfo/consensusMIBC>). Normalized log<sub>2</sub> expression data were used as an input.

### **Gene set enrichment analysis (GSEA) of DDR high and low groups**

To investigate the biological consequences of high expression of *DDR1/2* in BCa, we performed gene set enrichment analysis (GSEA) and digital dissection analyses to identify the cellular processes and immune cell components that are enriched in each of these types of tumors. We first stratified TCGA-BCa tumors by *DDR1* or *DDR2* expression at their median level and then compared the high and low groups. Finally, normalized enrichment scores of 50 hallmark genesets<sup>9</sup> were separately computed for *DDR1* and *DDR2*. Enriched gene sets were selected with nominal  $P < .05$  and  $FDR < .1$ .

### **Digital dissection analysis using cancer transcriptome**

We performed digital dissection analysis via a transcriptome-based cell type quantification method using MCP-Counter<sup>10</sup> to estimate how the presence of various immune cell types correlates with *DDR1/2* expression. Gene signatures for various immune cells and stromal components were obtained from CIBERSORT<sup>11</sup>, MCP-Counter<sup>10</sup> and xCell<sup>12</sup>. If the genes overlapped between different immune cell type signatures, only the cell type-specific genes were retained. For example, if the B cell subsets such as Memory B cell and Naïve B cells had overlapping genes in the original signatures, we removed the overlapping genes from both

signatures to represent subset-specific expression. Thus, resulting signatures had no overlap, with 11 memory B cell and 14 Naïve B cell signatures. Finally, we refined gene signatures for 23 immune cell types including Memory B cell, Naïve B cell, Memory CD4 T cell, Activated Memory CD4 T cell, Naïve CD4 T cell, CD8 T cell, Cytotoxic T lymphocytes, Activated Dendritic cells, Eosinophil, M0 Macrophage, M1 Macrophage, M2 Macrophage, Activated Mast cell, Monocyte, Activated NK cell, Neutrophil, Plasma cell, Activated Dysregulated T cell, Dysregulated T cell, Exhausted T cell, Follicular Helper T cell, Gamma Delta T cell and Regulatory T cell (**Supplementary Table 1**). Given these gene sets for immune cell types, we computed the immune score using MCP-counter method <sup>10</sup>.

### **T-cell-inflamed gene-expression profile (GEP) score in the TCGA pan-cancer cohort**

The T-cell-inflamed GEP score was used as an estimation for assessing the immune tumor microenvironment (TME), and its correlation with *DDR1* and *DDR2* gene expression was evaluated using transcriptomic data of the TCGA pan-cancer cohort (TCGA-pancan; n=10,323) obtained from the UCSC Xena browser <sup>8</sup>. Patients were stratified by *DDR1* and *DDR2* gene expression levels and T-cell-inflamed GEP scores (median) using cutoffs equivalent in prevalence to those used to define the clinical response groups in the TCGA-pancan.

### **Computation of DDR signature score**

A Z-score method <sup>13</sup> was employed to compute *DDR* signature scores in individual tumors with the *DDR1* and *DDR2* gene signature. Prior to the score calculation, patient gene expression data were centered by the median of all the samples. The score represents the difference between the error-weighted mean of the expression values of the genes in the *DDR* signature and the error-weighted mean of all genes in a sample. The result reflects both the magnitude and relative direction of *DDR* downstream genes.

## Differential expression analysis of distinct response groups in IMvigor210

The IMvigor210 data can be found in <http://research-pub.gene.com/IMvigor210CoreBiologies/>. Log2-scaled and TMM normalized expression data were employed to test differential expression of the genes by a Negative Binomial testing method <sup>6</sup>. FDR was estimated by Storey's method <sup>7</sup>.

## Refinement of DDR gene signatures for predicting response to PD-L1 therapy

We started with upregulated genes from *DDR1* RNA-seq data and selected genes that satisfied two criteria: 1) Cox Proportional Hazard Regression of overall survival P-value<0.05 and HR>1 and 2) log2-fold-change<-0.3, which are 95 percentile cutoffs of differential expression between stable disease/partial disease (SD/PD) and complete response/partial response (CR/PR) in the IMvigor210 cohort. This yielded a 10-gene signature (CS-10). In a different fashion, we also performed backward feature selection based on Cox regression of OS with 42 genes detected in IMvigor210 data. Comparisons of the full model with all 42 genes and the reduced model with a subset of the 42 genes were conducted with a log-likelihood test and 19 genes were selected for optimal subset for the *DDR1* Cox model (CS-19). Using the same method for *DDR2*, we selected 4 genes (CS-4) and 25 genes (CS-25) for the Z-score and Cox model, respectively. Finally, four gene signatures were developed: a 10-gene signature based on the Z-score model (CS-10) and 19-gene signature based on the Cox model (CS-19) for *DDR1*, and a 4-gene signature based on the Z-score model (CS-4) and 25-gene signature based on the Cox model (CS-25) for *DDR2*.

## **Non-small cell lung cancer (NSCLC) sample selection**

For the independent blinded validation study, two de-identified health records of NSCLC patients treated with FDA-approved ICT or ICT plus chemotherapy were selected from the Caris and Tempus databases and transcriptomic data were compiled from formalin-fixed, paraffin-embedded previously sequenced tumor samples. Progression-free survival (PFS), defined as the number of days from ICT start to the first documented tumor progression event, censored on the last known physician encounter, was used as the primary endpoint in survival analysis.

## **Assessing an association between DDR1/2 expression and PD-L1 expression/HLA defects/tumor mutational burden**

We used cBioPortal data (<https://www.cbioportal.org/>). Using the “Query by Gene” functionality, we put these gene names including DDR1, DDR2, PD-L1 (CD274), HLA-A, HLA-B, and HLA-C with the selection of “Bladder Urothelial Carcinoma TCGA Firehose Legacy” data or “TCGA PanCancer Atlas” study data. We then selected patient samples with both mutation profiles and transcriptome profiles for the use of “Plots” function to assess association between the DDR1/2 expression and PD-L1 expression/HLA defects/tumor mutational burden using scatter plot with regression and box plot analysis.

## REFERENCES

1. Tu MM, Lee FYF, Jones RT, et al. Targeting DDR2 enhances tumor response to anti-PD-1 immunotherapy. *Sci Adv.* 2019;5(2):eaav2437. doi: 10.1126/sciadv.aav2437.
2. Lee YC, Kurtova A V., Xiao J, et al. Collagen-rich airway smooth muscle cells are a metastatic niche for tumor colonization in the lung. *Nat Commun.* 2019;10(1):2131. doi: 10.1038/s41467-019-09878-4.
3. Dobin A, Davis CA, Schlesinger F, et al. STAR: Ultrafast universal RNA-seq aligner. *Bioinformatics.* 2013;29(1):15-21. doi: 10.1093/bioinformatics/bts635.
4. Li B, Dewey CN. RSEM: Accurate transcript quantification from RNA-Seq data with or without a reference genome. *BMC Bioinformatics.* 2011;12:323. doi: 10.1186/1471-2105-12-323.
5. Robinson MD, Oshlack A. A scaling normalization method for differential expression analysis of RNA-seq data. *Genome Biol.* 2010;11(3):R25. doi: 10.1186/gb-2010-11-3-r25.
6. Anders S, Huber W. Differential expression analysis for sequence count data. *Genome Biol.* 2010;11(10):R106. doi: 10.1186/gb-2010-11-10-r106.
7. Storey JD, Tibshirani R. Statistical significance for genomewide studies. *Proc Natl Acad Sci USA.* 2003;100(16):9440-9445. doi: 10.1073/pnas.1530509100.
8. Goldman MJ, Craft B, Hastie M, et al. Visualizing and interpreting cancer genomics data via the Xena platform. *Nat Biotechnol.* 2020;38(6):675-678. doi: 10.1038/s41587-020-0546-8.
9. Liberzon A, Birger C, Thorvaldsdóttir H, Ghandi M, Mesirov JP, Tamayo P. The Molecular Signatures Database (MSigDB) hallmark gene set collection. *Cell Syst.* 2015;1(6):417-425. doi: 10.1016/j.cels.2015.12.004.

10. Becht E, Giraldo NA, Lacroix L, et al. Estimating the population abundance of tissue-infiltrating immune and stromal cell populations using gene expression. *Genome Biol.* 2016;17(1):218. doi: 10.1186/s13059-016-1070-5.
11. Newman AM, Liu CL, Green MR, et al. Robust enumeration of cell subsets from tissue expression profiles. *Nat Methods.* 2015;12(5):453-457. doi: 10.1038/nmeth.3337.
12. Aran D, Hu Z, Butte AJ. xCell: Digitally portraying the tissue cellular heterogeneity landscape. *Genome Biol.* 2017;18(1):220. doi: 10.1186/s13059-017-1349-1.
13. Levine DM, Haynor DR, Castle JC, et al. Pathway and gene-set activation measurement from mRNA expression data: The tissue distribution of human pathways. *Genome Biol.* 2006;7(10):R93. doi: 10.1186/gb-2006-7-10-r93.

**Supplementary Table 1**, Lists of genes (Entrez Gene IDs) for individual immune cell types used to estimate abundance of cell types with cancer transcriptome.

| Memory B cell | Naive B cell | Memory CD4 T cell | Activated Memory CD4 T cell | Naive CD4 T cell | CD8 T cell | Cytotoxic T lymphocytes | Activated Dendritic cells | Eosinophil | M0 Macrophage | M1 Macrophage | M2 Macrophage | Activated Mast cell | Monocyte | Activated NK cell | Neutrophil | Plasma cell | Activated Dysregulated T cell | Dysregulated T cell | Exhausted T cell | Follicular Helper T cell | Gamma Delta T cell | Regulatory T cell |
|---------------|--------------|-------------------|-----------------------------|------------------|------------|-------------------------|---------------------------|------------|---------------|---------------|---------------|---------------------|----------|-------------------|------------|-------------|-------------------------------|---------------------|------------------|--------------------------|--------------------|-------------------|
| 9447          | 5244         | 2035              | 993                         | 9744             | 926        | 925                     | 58504                     | 597        | 79365         | 43            | 6358          | 3198                | 55803    | 762               | 60489      | 23457       | 226                           | 355                 | 123              | 767                      | 631                | 8538              |
| 240           | 605          | 2113              | 3605                        | 79722            | 925        | 8320                    | 330                       | 27202      | 6354          | 80833         | 6368          | 3552                | 1436     | 1084              | 894        | 270         | 302                           | 602                 | 419              | 1117                     | 9024               | 921               |
| 9629          | 79656        | 55336             | 55801                       | 55086            |            | 83888                   | 941                       | 1602       | 1296          | 408           | 1414          | 3553                | 2359     | 3577              | 1021       | 51378       | 506                           | 604                 | 466              | 7976                     | 1234               | 970               |
| 9750          | 673          | 57326             | 3565                        | 2041             |            | 10578                   | 942                       | 23604      | 1435          | 958           | 55691         | 3567                | 8942     | 3579              | 356        | 6315        | 515                           | 784                 | 699              | 3382                     | 11314              | 752014            |
| 3446          | 3566         | 140801            | 3578                        | 79667            |            | 3823                    | 56548                     | 9681       | 6374          | 4283          | 2952          | 81698               | 7941     | 4051              | 3805       | 79703       | 811                           | 817                 | 760              | 59067                    | 1010               | 29121             |
| 3574          | 283876       | 28670             | 4998                        | 79690            |            | 8302                    | 2117                      | 2015       | 81501         | 1594          | 3269          | 115123              | 83937    | 2215              | 3809       | 2826        | 822                           | 901                 | 832              | 23178                    | 8292               | 1946              |
| 440348        | 4224         | 28662             | 9136                        | 2587             |            | 3824                    | 3593                      | 22905      | 2239          | 643314        | 80896         | 7006                | 22797    | 3034              | 5008       | 3012        | 1400                          | 930                 | 836              | 5133                     | 10663              | 50943             |
| 11262         | 57553        | 678               | 220134                      | 5871             |            |                         | 9175                      | 2696       | 8685          | 6504          | 5973          |                     |          | 3772              |            | 8339        | 1465                          | 972                 | 837              | 56301                    | 2996               | 83786             |
| 23495         | 55335        |                   |                             | 26297            |            |                         | 9242                      | 1880       | 4318          | 54795         | 81029         |                     |          | 1955              |            | 3497        | 1786                          | 1236                | 924              | 28951                    | 10219              | 3090              |
| 9618          | 5670         |                   |                             | 50853            |            |                         | 8013                      | 8477       | 5473          | 968           | 9332          |                     |          | 51312             |            | 3738        | 1846                          | 1453                | 928              | 7253                     | 442236             | 203510            |
| 27033         | 6402         |                   |                             | 7476             |            |                         | 81796                     | 3568       | 3684          |               |               |                     |          | 79689             |            | 26251       | 2023                          | 1912                | 953              | 65986                    | 3973               | 55243             |
|               | 8115         |                   |                             | 7754             |            |                         | 8792                      | 4033       |               |               |               |                     |          | 9895              |            | 4121        | 2597                          | 2308                | 1359             |                          | 4110               | 3904              |
|               | 54576        |                   |                             | 25799            |            |                         | 3687                      | 27334      |               |               |               |                     |          | 7090              |            | 79694       | 2617                          | 2625                | 1376             |                          | 643503             | 23547             |
|               | 57335        |                   |                             |                  |            |                         |                           | 5029       |               |               |               |                     |          | 8794              |            | 22983       | 3015                          | 2859                | 1419             |                          | 79973              | 126987            |
|               |              |                   |                             |                  |            |                         |                           | 5146       |               |               |               |                     |          | 55350             |            | 374977      | 3054                          | 3164                | 1493             |                          |                    | 4861              |
|               |              |                   |                             |                  |            |                         |                           | 27039      |               |               |               |                     |          |                   |            | 51237       | 3070                          | 3561                | 1690             |                          |                    | 4917              |
|               |              |                   |                             |                  |            |                         |                           | 23223      |               |               |               |                     |          |                   |            | 5081        | 3326                          | 3682                | 2107             |                          |                    | 56143             |
|               |              |                   |                             |                  |            |                         |                           | 64092      |               |               |               |                     |          |                   |            | 5163        | 3490                          | 3717                | 2820             |                          |                    | 9651              |
|               |              |                   |                             |                  |            |                         |                           | 55512      |               |               |               |                     |          |                   |            | 25780       | 3516                          | 4602                | 3394             |                          |                    | 5793              |
|               |              |                   |                             |                  |            |                         |                           | 27293      |               |               |               |                     |          |                   |            | 5972        | 3559                          | 4723                | 3604             |                          |                    | 6261              |
|               |              |                   |                             |                  |            |                         |                           | 140803     |               |               |               |                     |          |                   |            | 6676        | 3587                          | 4853                | 3627             |                          |                    | 25956             |
|               |              |                   |                             |                  |            |                         |                           | 7673       |               |               |               |                     |          |                   |            | 27090       | 3939                          | 5283                | 3669             |                          |                    | 5413              |
|               |              |                   |                             |                  |            |                         |                           |            |               |               |               |                     |          |                   |            | 9333        | 3956                          | 5450                | 3685             |                          |                    | 9806              |
|               |              |                   |                             |                  |            |                         |                           |            |               |               |               |                     |          |                   |            | 7367        | 3978                          | 5609                | 3718             |                          |                    | 6756              |
|               |              |                   |                             |                  |            |                         |                           |            |               |               |               |                     |          |                   |            | 81030       | 4085                          | 5641                | 3902             |                          |                    | 7299              |
|               |              |                   |                             |                  |            |                         |                           |            |               |               |               |                     |          |                   |            | 7718        | 4175                          | 5862                | 4223             |                          |                    |                   |
|               |              |                   |                             |                  |            |                         |                           |            |               |               |               |                     |          |                   |            |             | 5230                          | 5914                | 4288             |                          |                    |                   |
|               |              |                   |                             |                  |            |                         |                           |            |               |               |               |                     |          |                   |            |             | 5315                          | 5971                | 4622             |                          |                    |                   |
|               |              |                   |                             |                  |            |                         |                           |            |               |               |               |                     |          |                   |            |             | 5426                          | 6641                | 4772             |                          |                    |                   |
|               |              |                   |                             |                  |            |                         |                           |            |               |               |               |                     |          |                   |            |             | 5499                          | 8315                | 4929             |                          |                    |                   |
|               |              |                   |                             |                  |            |                         |                           |            |               |               |               |                     |          |                   |            |             | 5524                          | 8665                | 5074             |                          |                    |                   |
|               |              |                   |                             |                  |            |                         |                           |            |               |               |               |                     |          |                   |            |             | 5557                          | 8897                | 5090             |                          |                    |                   |
|               |              |                   |                             |                  |            |                         |                           |            |               |               |               |                     |          |                   |            |             | 5781                          | 9063                | 5179             |                          |                    |                   |
|               |              |                   |                             |                  |            |                         |                           |            |               |               |               |                     |          |                   |            |             | 5934                          | 9114                | 5359             |                          |                    |                   |
|               |              |                   |                             |                  |            |                         |                           |            |               |               |               |                     |          |                   |            |             | 5962                          | 9153                | 5414             |                          |                    |                   |
|               |              |                   |                             |                  |            |                         |                           |            |               |               |               |                     |          |                   |            |             | 6187                          | 9520                | 5445             |                          |                    |                   |
|               |              |                   |                             |                  |            |                         |                           |            |               |               |               |                     |          |                   |            |             | 6240                          | 9589                | 5653             |                          |                    |                   |
|               |              |                   |                             |                  |            |                         |                           |            |               |               |               |                     |          |                   |            |             | 6275                          | 9770                | 5732             |                          |                    |                   |
|               |              |                   |                             |                  |            |                         |                           |            |               |               |               |                     |          |                   |            |             | 6675                          | 10019               | 5734             |                          |                    |                   |
|               |              |                   |                             |                  |            |                         |                           |            |               |               |               |                     |          |                   |            |             | 7027                          | 10039               | 5783             |                          |                    |                   |
|               |              |                   |                             |                  |            |                         |                           |            |               |               |               |                     |          |                   |            |             | 7112                          | 10252               | 5954             |                          |                    |                   |
|               |              |                   |                             |                  |            |                         |                           |            |               |               |               |                     |          |                   |            |             | 7167                          | 10318               | 6004             |                          |                    |                   |
|               |              |                   |                             |                  |            |                         |                           |            |               |               |               |                     |          |                   |            |             | 7227                          | 10427               | 6284             |                          |                    |                   |
|               |              |                   |                             |                  |            |                         |                           |            |               |               |               |                     |          |                   |            |             | 7293                          | 10437               | 6348             |                          |                    |                   |
|               |              |                   |                             |                  |            |                         |                           |            |               |               |               |                     |          |                   |            |             | 7533                          | 10672               | 6351             |                          |                    |                   |
|               |              |                   |                             |                  |            |                         |                           |            |               |               |               |                     |          |                   |            |             | 8079                          | 10678               | 6629             |                          |                    |                   |
|               |              |                   |                             |                  |            |                         |                           |            |               |               |               |                     |          |                   |            |             | 8318                          | 10765               | 6696             |                          |                    |                   |
|               |              |                   |                             |                  |            |                         |                           |            |               |               |               |                     |          |                   |            |             | 8352                          | 10957               | 6845             |                          |                    |                   |
|               |              |                   |                             |                  |            |                         |                           |            |               |               |               |                     |          |                   |            |             | 8467                          | 11182               | 6919             |                          |                    |                   |
|               |              |                   |                             |                  |            |                         |                           |            |               |               |               |                     |          |                   |            |             | 8553                          | 22807               | 6988             |                          |                    |                   |
|               |              |                   |                             |                  |            |                         |                           |            |               |               |               |                     |          |                   |            |             | 8676                          | 23030               | 7132             |                          |                    |                   |
|               |              |                   |                             |                  |            |                         |                           |            |               |               |               |                     |          |                   |            |             | 9123                          | 23075               | 7280             |                          |                    |                   |
|               |              |                   |                             |                  |            |                         |                           |            |               |               |               |                     |          |                   |            |             | 9125                          | 23479               | 7462             |                          |                    |                   |
|               |              |                   |                             |                  |            |                         |                           |            |               |               |               |                     |          |                   |            |             | 9282                          | 23608               | 7706             |                          |                    |                   |



|        |           |        |
|--------|-----------|--------|
| 9334   | 26524     | 8411   |
| 9761   | 27436     | 9034   |
| 9837   | 29933     | 9047   |
| 10112  | 50807     | 9289   |
| 10460  | 50852     | 9573   |
| 10572  | 51274     | 9584   |
| 10885  | 54870     | 9636   |
| 10988  | 54982     | 10010  |
| 11004  | 55633     | 10752  |
| 11072  | 56986     | 10960  |
| 11073  | 57560     | 11113  |
| 23531  | 57823     | 11126  |
| 25896  | 64781     | 23467  |
| 27166  | 64784     | 25771  |
| 27351  | 65018     | 26994  |
| 51514  | 79161     | 29089  |
| 54529  | 81537     | 29094  |
| 54602  | 83719     | 29969  |
| 57045  | 84135     | 51186  |
| 57194  | 84275     | 51278  |
| 63979  | 84333     | 51744  |
| 84188  | 84961     | 53981  |
| 90861  | 85477     | 63932  |
| 116496 | 91768     | 64135  |
| 132660 | 112574    | 64222  |
| 161176 | 114836    | 65125  |
| 283373 | 114885    | 79073  |
| 283871 | 130074    | 80762  |
|        | 153020    | 80829  |
|        | 160622    | 81544  |
|        | 197370    | 81892  |
|        | 284996    | 84293  |
|        | 347733    | 85440  |
|        | 391059    | 91107  |
|        | 415116    | 92799  |
|        | 643836    | 137492 |
|        | 100131897 | 140823 |
|        |           | 158219 |
|        |           | 253558 |

**Supplementary Table 2.** Differentially expressed genes in DDR1 overexpression xenografts.

| EntrezID | Symbol  | Description                                                                          | DDR1 OE vs Ctrl |       |
|----------|---------|--------------------------------------------------------------------------------------|-----------------|-------|
|          |         |                                                                                      | log2FC          | FDR   |
| 28       | ABO     | ABO, alpha 1-3-N-acetylgalactosaminyltransferase and alpha 1-3-galactosyltransferase | 1.48            | 0.01  |
| 41       | ASIC1   | acid sensing ion channel subunit 1                                                   | 1.2             | 0.03  |
| 135      | ADORA2A | adenosine A2a receptor                                                               | 1.5             | 0.03  |
| 218      | ALDH3A1 | aldehyde dehydrogenase 3 family member                                               | 2.28            | <0.01 |
| 286      | ANK1    | ankyrin 1                                                                            | 1.3             | <0.01 |
| 341      | APOC1   | apolipoprotein C1                                                                    | 1.46            | 0.01  |
| 360      | AQP3    | aquaporin 3 (Gill blood group)                                                       | 2.22            | <0.01 |
| 627      | BDNF    | brain derived neurotrophic factor                                                    | 1.08            | 0.04  |
| 771      | CA12    | carbonic anhydrase 12                                                                | 1.95            | <0.01 |
| 780      | DDR1    | discoidin domain receptor tyrosine kinase 1                                          | 1.53            | <0.01 |
| 793      | CALB1   | calbindin 1                                                                          | 1.34            | 0.01  |
| 810      | CALML3  | calmodulin like 3                                                                    | 1.54            | <0.01 |
| 875      | CBS     | cystathionine beta-synthase                                                          | 1.06            | 0.02  |
| 1113     | CHGA    | chromogranin A                                                                       | 2.18            | <0.01 |
| 1116     | CHI3L1  | chitinase 3 like 1                                                                   | 2.21            | <0.01 |
| 1152     | CKB     | creatine kinase B                                                                    | 1.49            | 0.01  |
| 1201     | CLN3    | CLN3 lysosomal/endosomal transmembrane protein, battenin                             | 2.54            | <0.01 |
| 1293     | COL6A3  | collagen type VI alpha 3 chain                                                       | 1.02            | <0.01 |
| 1388     | ATF6B   | activating transcription factor 6 beta                                               | 2.48            | <0.01 |
| 1396     | CRIP1   | cysteine rich protein 1                                                              | 2.05            | <0.01 |
| 1397     | CRIP2   | cysteine rich protein 2                                                              | 1.03            | <0.01 |
| 1464     | CSPG4   | chondroitin sulfate proteoglycan 4                                                   | 1.28            | 0.01  |
| 1525     | CXADR   | CXADR Ig-like cell adhesion molecule                                                 | 1.36            | <0.01 |
| 1551     | CYP3A7  | cytochrome P450 family 3 subfamily A                                                 | 1.22            | 0.05  |
| 1555     | CYP2B6  | cytochrome P450 family 2 subfamily B                                                 | 1.63            | <0.01 |
| 1556     | CYP2B7P | cytochrome P450 family 2 subfamily B member 7, pseudogene                            | 1.44            | 0.02  |
| 1645     | AKR1C1  | aldo-keto reductase family 1 member C1                                               | 1.05            | <0.01 |
| 1646     | AKR1C2  | aldo-keto reductase family 1 member C2                                               | 1.05            | 0.01  |
| 1672     | DEFB1   | defensin beta 1                                                                      | 2.23            | <0.01 |
| 1917     | EEF1A2  | eukaryotic translation elongation factor 1                                           | 1.89            | <0.01 |
| 1953     | MEGF6   | multiple EGF like domains 6                                                          | 1.77            | <0.01 |
| 2036     | EPB41L1 | erythrocyte membrane protein band 4.1 like                                           | 1.41            | <0.01 |
| 2078     | ERG     | ETS transcription factor ERG                                                         | 1.49            | <0.01 |
| 2261     | FGFR3   | fibroblast growth factor receptor 3                                                  | 2.07            | <0.01 |
| 2295     | FOXF2   | forkhead box F2                                                                      | 1.13            | 0.04  |
| 2304     | FOXE1   | forkhead box E1                                                                      | 1.95            | <0.01 |
| 2331     | FMOD    | fibromodulin                                                                         | 1.21            | 0.03  |
| 2354     | FOSB    | FosB proto-oncogene, AP-1 transcription factor subunit                               | 1.15            | <0.01 |
| 2624     | GATA2   | GATA binding protein 2                                                               | 1.2             | 0.03  |

|      |          |                                                        |      |       |
|------|----------|--------------------------------------------------------|------|-------|
| 2657 | GDF1     | growth differentiation factor 1                        | 1.43 | 0.04  |
| 2687 | GGT5     | gamma-glutamyltransferase 5                            | 1.32 | 0.01  |
| 2696 | GIPR     | gastric inhibitory polypeptide receptor                | 1.14 | 0.04  |
| 2752 | GLUL     | glutamate-ammonia ligase                               | 1.13 | <0.01 |
| 3037 | HAS2     | hyaluronan synthase 2                                  | 1.27 | 0.01  |
| 3398 | ID2      | inhibitor of DNA binding 2                             | 1.28 | <0.01 |
| 3485 | IGFBP2   | insulin like growth factor binding protein 2           | 1.98 | 0.01  |
| 3557 | IL1RN    | interleukin 1 receptor antagonist                      | 1.14 | 0.04  |
| 3560 | IL2RB    | interleukin 2 receptor subunit beta                    | 1.87 | <0.01 |
| 3705 | ITPK1    | inositol-tetrakisphosphate 1-kinase                    | 1.21 | <0.01 |
| 3776 | KCNK2    | potassium two pore domain channel subfamily K member 2 | 1.15 | 0.01  |
| 3853 | KRT6A    | keratin 6A                                             | 1.32 | <0.01 |
| 3860 | KRT13    | keratin 13                                             | 1.4  | <0.01 |
| 3861 | KRT14    | keratin 14                                             | 1.23 | <0.01 |
| 3934 | LCN2     | lipocalin 2                                            | 1.03 | <0.01 |
| 3958 | LGALS3   | galectin 3                                             | 1    | <0.01 |
| 4046 | LSP1     | lymphocyte specific protein 1                          | 2.08 | <0.01 |
| 4128 | MAOA     | monoamine oxidase A                                    | 1.21 | <0.01 |
| 4143 | MAT1A    | methionine adenosyltransferase 1A                      | 1.44 | 0.01  |
| 4210 | MEFV     | MEFV innate immunity regulator, pyrin                  | 1.4  | 0.02  |
| 4549 | RNR1     | s-rRNA                                                 | 2.05 | <0.01 |
| 4550 | RNR2     | l-rRNA                                                 | 1.76 | <0.01 |
| 4582 | MUC1     | mucin 1, cell surface associated                       | 1.38 | 0.01  |
| 4586 | MUC5AC   | mucin 5AC, oligomeric mucus/gel-forming                | 1.58 | <0.01 |
| 4588 | MUC6     | mucin 6, oligomeric mucus/gel-forming                  | 1.17 | 0.04  |
| 4680 | CEACAM6  | CEA cell adhesion molecule 6                           | 1.16 | <0.01 |
| 4856 | CCN3     | cellular communication network factor 3                | 1.21 | <0.01 |
| 4883 | NPR3     | natriuretic peptide receptor 3                         | 1.62 | 0.01  |
| 4923 | NTSR1    | neurotensin receptor 1                                 | 1.33 | 0.01  |
| 5064 | PALM     | paralemmin                                             | 1.68 | <0.01 |
| 5081 | PAX7     | paired box 7                                           | 2.18 | <0.01 |
| 5138 | PDE2A    | phosphodiesterase 2A                                   | 1.2  | 0.03  |
| 5187 | PER1     | period circadian regulator 1                           | 1.17 | <0.01 |
| 5360 | PLTP     | phospholipid transfer protein                          | 1.17 | 0.04  |
| 5583 | PRKCH    | protein kinase C eta                                   | 1.1  | <0.01 |
| 5625 | PRODH    | proline dehydrogenase 1                                | 2.15 | <0.01 |
| 5797 | PTPRM    | protein tyrosine phosphatase receptor type             | 1.89 | <0.01 |
| 5909 | RAP1GAP  | RAP1 GTPase activating protein                         | 1.58 | <0.01 |
| 6217 | RPS16    | ribosomal protein S16                                  | 1.18 | <0.01 |
| 6317 | SERPINB3 | serpin family B member 3                               | 1.51 | 0.02  |
| 6337 | SCNN1A   | sodium channel epithelial 1 subunit alpha              | 1.06 | 0.01  |
| 6338 | SCNN1B   | sodium channel epithelial 1 subunit beta               | 2.36 | <0.01 |
| 6340 | SCNN1G   | sodium channel epithelial 1 subunit gamma              | 1.54 | <0.01 |
| 6563 | SLC14A1  | solute carrier family 14 member 1 (Kidd blood group)   | 1.12 | <0.01 |
| 6564 | SLC15A1  | solute carrier family 15 member 1                      | 1.11 | 0.04  |
| 6755 | SSTR5    | somatostatin receptor 5                                | 1.28 | 0.03  |

|       |          |                                                                      |      |       |
|-------|----------|----------------------------------------------------------------------|------|-------|
| 6781  | STC1     | stanniocalcin 1                                                      | 1.16 | <0.01 |
| 6899  | TBX1     | T-box transcription factor 1                                         | 1.38 | 0.04  |
| 7031  | TFF1     | trefoil factor 1                                                     | 4.44 | <0.01 |
| 7033  | TFF3     | trefoil factor 3                                                     | 2.1  | <0.01 |
| 7045  | TGFBI    | transforming growth factor beta induced                              | 1.19 | <0.01 |
| 7051  | TGM1     | transglutaminase 1                                                   | 1.63 | <0.01 |
| 7062  | TCHH     | trichohyalin                                                         | 1.29 | 0.02  |
| 7136  | TNNI2    | troponin I2, fast skeletal type                                      | 1.33 | <0.01 |
| 7140  | TNNT3    | troponin T3, fast skeletal type                                      | 1.64 | <0.01 |
| 7356  | SCGB1A1  | secretoglobin family 1A member 1                                     | 1.91 | <0.01 |
| 8170  | SLC14A2  | solute carrier family 14 member 2                                    | 1.68 | 0.04  |
| 8436  | CAVIN2   | caveolae associated protein 2                                        | 1.29 | 0.03  |
| 8515  | ITGA10   | integrin subunit alpha 10                                            | 1.34 | <0.01 |
| 8581  | LY6D     | lymphocyte antigen 6 family member D                                 | 1.42 | <0.01 |
| 8645  | KCNK5    | potassium two pore domain channel<br>subfamily K member 5            | 1.21 | 0.01  |
| 8857  | FCGBP    | Fc fragment of IgG binding protein                                   | 3.24 | <0.01 |
| 9145  | SYNGR1   | synaptogyrin 1                                                       | 1.58 | <0.01 |
| 9249  | DHRS3    | dehydrogenase/reductase 3                                            | 1.35 | <0.01 |
| 9252  | RPS6KA5  | ribosomal protein S6 kinase A5                                       | 1    | <0.01 |
| 9351  | SLC9A3R2 | SLC9A3 regulator 2                                                   | 1.01 | <0.01 |
| 9537  | TP53I11  | tumor protein p53 inducible protein 11                               | 2.82 | <0.01 |
| 10516 | FBLN5    | fibulin 5                                                            | 2.14 | <0.01 |
| 10529 | NEBL     | nebulette                                                            | 2.85 | <0.01 |
| 10551 | AGR2     | anterior gradient 2, protein disulphide<br>isomerase family member   | 2.02 | <0.01 |
| 10562 | OLFM4    | olfactomedin 4                                                       | 1.75 | <0.01 |
| 10595 | ERN2     | endoplasmic reticulum to nucleus signaling                           | 1.97 | <0.01 |
| 10811 | NOXA1    | NADPH oxidase activator 1                                            | 1.85 | 0.01  |
| 10863 | ADAM28   | ADAM metallopeptidase domain 28                                      | 2.5  | <0.01 |
| 11199 | ANXA10   | annexin A10                                                          | 3.29 | <0.01 |
| 11247 | NXPH4    | neurexophilin 4                                                      | 2.47 | <0.01 |
| 23213 | SULF1    | sulfatase 1                                                          | 1    | 0.01  |
| 23242 | COBL     | cordon-bleu WH2 repeat protein                                       | 1.05 | 0.05  |
| 23508 | TTC9     | tetratricopeptide repeat domain 9                                    | 1.28 | 0.02  |
| 23584 | VSIG2    | V-set and immunoglobulin domain                                      | 1.57 | 0.01  |
| 25803 | SPDEF    | SAM pointed domain containing ETS<br>transcription factor            | 2.07 | <0.01 |
| 25825 | BACE2    | beta-secretase 2                                                     | 1.45 | <0.01 |
| 25891 | PAMR1    | peptidase domain containing associated<br>with muscle regeneration 1 | 1.24 | 0.01  |
| 27132 | CPNE7    | copine 7                                                             | 2.19 | <0.01 |
| 50614 | GALNT9   | polypeptide N-                                                       | 2.33 | <0.01 |
| 51162 | EGFL7    | EGF like domain multiple 7                                           | 1.38 | <0.01 |
| 51286 | CEND1    | cell cycle exit and neuronal differentiation 1                       | 1.36 | 0.04  |
| 51297 | BPIFA1   | BPI fold containing family A member 1                                | 1.86 | <0.01 |
| 51673 | TPPP3    | tubulin polymerization promoting protein<br>family member 3          | 1.23 | 0.01  |

|        |           |                                                               |      |       |
|--------|-----------|---------------------------------------------------------------|------|-------|
| 54848  | ARHGEF38  | Rho guanine nucleotide exchange factor 38                     | 1.68 | <0.01 |
| 54873  | PALMD     | palmdelphin                                                   | 1.27 | <0.01 |
| 55068  | ENOX1     | ecto-NOX disulfide-thiol exchanger 1                          | 1.47 | 0.02  |
| 55089  | SLC38A4   | solute carrier family 38 member 4                             | 1.25 | 0.01  |
| 55107  | ANO1      | anoctamin 1                                                   | 1.08 | <0.01 |
| 55638  | SYBU      | syntabulin                                                    | 1.25 | 0.02  |
| 56103  | PCDHGB2   | protocadherin gamma subfamily B, 2                            | 1.05 | 0.05  |
| 56172  | ANKH      | ANKH inorganic pyrophosphate transport regulator              | 1.2  | <0.01 |
| 56241  | SUSD2     | sushi domain containing 2                                     | 1.21 | <0.01 |
| 56704  | JPH1      | junctionophilin 1                                             | 1.49 | 0.02  |
| 56901  | NDUFA4L2  | NDUFA4 mitochondrial complex associated                       | 2.47 | <0.01 |
| 56924  | PAK6      | p21 (RAC1) activated kinase 6                                 | 1.38 | <0.01 |
| 57016  | AKR1B10   | aldo-keto reductase family 1 member B10                       | 1.77 | <0.01 |
| 57161  | PELI2     | pellino E3 ubiquitin protein ligase family                    | 1.42 | <0.01 |
| 57537  | SORCS2    | sortilin related VPS10 domain containing receptor 2           | 1.86 | <0.01 |
| 64115  | VSIR      | V-set immunoregulatory receptor                               | 1.03 | 0.01  |
| 64714  | PDIA2     | protein disulfide isomerase family A                          | 1.76 | 0.02  |
| 79007  | DBNDD1    | dysbindin domain containing 1                                 | 1.2  | 0.04  |
| 79812  | MMRN2     | multimerin 2                                                  | 1.51 | <0.01 |
| 79838  | TMC5      | transmembrane channel like 5                                  | 1.37 | 0.01  |
| 80195  | TMEM254   | transmembrane protein 254                                     | 1.12 | <0.01 |
| 80726  | IQCN      | IQ motif containing N                                         | 1.61 | <0.01 |
| 81693  | AMN       | amnion associated transmembrane protein                       | 1.91 | <0.01 |
| 83481  | EPPK1     | epiplakin 1                                                   | 1.73 | <0.01 |
| 83643  | CCDC3     | coiled-coil domain containing 3                               | 1.15 | 0.03  |
| 83872  | HMCN1     | hemicentin 1                                                  | 2.1  | <0.01 |
| 84152  | PPP1R1B   | protein phosphatase 1 regulatory inhibitor subunit 1B         | 1.55 | <0.01 |
| 84525  | HOPX      | HOP homeobox                                                  | 1.33 | 0.02  |
| 84871  | AGBL4     | ATP/GTP binding protein like 4                                | 1.5  | 0.02  |
| 84969  | TOX2      | TOX high mobility group box family member                     | 1.84 | <0.01 |
| 85358  | SHANK3    | SH3 and multiple ankyrin repeat domains 3                     | 1.29 | <0.01 |
| 85379  | KIAA1671  | KIAA1671                                                      | 1.02 | <0.01 |
| 89874  | SLC25A21  | solute carrier family 25 member 21                            | 1.26 | 0.03  |
| 90019  | SYT8      | synaptotagmin 8                                               | 1.32 | <0.01 |
| 90523  | MLIP      | muscular LMNA interacting protein                             | 2.57 | <0.01 |
| 90632  | LINC00473 | long intergenic non-protein coding RNA 473                    | 1.17 | 0.05  |
| 90865  | IL33      | interleukin 33                                                | 3.16 | <0.01 |
| 90993  | CREB3L1   | cAMP responsive element binding protein 3                     | 2.01 | <0.01 |
| 93010  | B3GNT7    | UDP-GlcNAc:betaGal beta-1,3-N-acetylglucosaminyltransferase 7 | 1.12 | <0.01 |
| 93429  | LOC93429  | uncharacterized LOC93429                                      | 1.64 | 0.01  |
| 94122  | SYTL5     | synaptotagmin like 5                                          | 1.28 | 0.04  |
| 94234  | FOXQ1     | forkhead box Q1                                               | 1.99 | <0.01 |
| 112399 | EGLN3     | egl-9 family hypoxia inducible factor 3                       | 1.08 | <0.01 |
| 114784 | CSMD2     | CUB and Sushi multiple domains 2                              | 2.49 | <0.01 |

|           |            |                                                          |      |       |
|-----------|------------|----------------------------------------------------------|------|-------|
| 115650    | TNFRSF13C  | TNF receptor superfamily member 13C                      | 1.4  | 0.01  |
| 116154    | PHACTR3    | phosphatase and actin regulator 3                        | 1.37 | 0.01  |
| 120224    | TMEM45B    | transmembrane protein 45B                                | 2.59 | <0.01 |
| 122622    | ADSS1      | adenylosuccinate synthase 1                              | 1.79 | <0.01 |
| 130576    | LYPD6B     | LY6/PLAUR domain containing 6B                           | 1.64 | <0.01 |
| 136288    | C7orf57    | chromosome 7 open reading frame 57                       | 2.06 | <0.01 |
| 139065    | SLITRK4    | SLIT and NTRK like family member 4                       | 1.69 | <0.01 |
| 140825    | NEURL2     | neuralized E3 ubiquitin protein ligase 2                 | 1.42 | 0.03  |
| 145482    | PTGR2      | prostaglandin reductase 2                                | 1.11 | 0.02  |
| 146336    | SSTR5-AS1  | SSTR5 antisense RNA 1                                    | 1.48 | <0.01 |
| 146802    | SLC47A2    | solute carrier family 47 member 2                        | 1.23 | 0.01  |
| 151473    | SLC16A14   | solute carrier family 16 member 14                       | 1.64 | <0.01 |
| 161247    | FITM1      | fat storage inducing transmembrane protein               | 1.39 | 0.02  |
| 163688    | CALML6     | calmodulin like 6                                        | 1.56 | 0.04  |
| 191585    | PLAC4      | placenta enriched 4                                      | 1.22 | 0.04  |
| 196051    | PLPP4      | phospholipid phosphatase 4                               | 1.32 | 0.02  |
| 202151    | RANBP3L    | RAN binding protein 3 like                               | 1.34 | 0.01  |
| 256158    | HMCN2      | hemicentin 2                                             | 2.39 | <0.01 |
| 260293    | CYP4X1     | cytochrome P450 family 4 subfamily X                     | 1.3  | 0.02  |
| 283120    | H19        | H19 imprinted maternally expressed                       | 1.51 | <0.01 |
| 283848    | CES4A      | carboxylesterase 4A                                      | 1.84 | <0.01 |
| 283897    | C16orf54   | chromosome 16 open reading frame 54                      | 1.19 | 0.05  |
| 284021    | MILR1      | mast cell immunoglobulin like receptor 1                 | 1.19 | 0.02  |
| 284339    | TMEM145    | transmembrane protein 145                                | 1.69 | 0.01  |
| 286343    | LURAP1L    | leucine rich adaptor protein 1 like                      | 1.05 | 0.03  |
| 319085    | ITPK1-AS1  | ITPK1 antisense RNA 1                                    | 1.24 | 0.03  |
| 340113    | LINC02120  | long intergenic non-protein coding RNA                   | 1.41 | 0.04  |
| 342574    | KRT27      | keratin 27                                               | 1.4  | <0.01 |
| 343578    | ARHGAP40   | Rho GTPase activating protein 40                         | 1.48 | 0.02  |
| 353194    | KRT16P6    | keratin 16 pseudogene 6                                  | 1.17 | <0.01 |
| 374378    | GALNT18    | polypeptide N-                                           | 1.13 | <0.01 |
| 374918    | IGFL1      | IGF like family member 1                                 | 2.27 | <0.01 |
| 388743    | CAPN8      | calpain 8                                                | 2.45 | <0.01 |
| 389197    | C4orf50    | chromosome 4 open reading frame 50                       | 1.51 | 0.01  |
| 400916    | CHCHD10    | coiled-coil-helix-coiled-coil-helix domain containing 10 | 1.22 | <0.01 |
| 401093    | MBNL1-AS1  | MBNL1 antisense RNA 1                                    | 1.45 | <0.01 |
| 401546    | C9orf152   | chromosome 9 open reading frame 152                      | 1.46 | 0.01  |
| 441058    | LINC01667  | long intergenic non-protein coding RNA                   | 2.98 | <0.01 |
| 441425    | ANKRD20A3F | ankyrin repeat domain 20 family member A3, pseudogene    | 1.34 | 0.01  |
| 494470    | RNF165     | ring finger protein 165                                  | 1.27 | <0.01 |
| 642954    | RBBP4P1    | RBBP4 pseudogene 1                                       | 1.38 | 0.01  |
| 643596    | RNF224     | ring finger protein 224                                  | 1.64 | 0.03  |
| 644809    | C15orf56   | chromosome 15 open reading frame 56                      | 1.42 | 0.02  |
| 767557    | SYS1-DBNDD | SYS1-DBNDD2 readthrough (NMD)                            | 1.36 | 0.03  |
| 100008587 | RNA5-8SN5  | RNA, 5.8S ribosomal N5                                   | 2.6  | <0.01 |
| 100133545 | MRPL23-AS1 | MRPL23 antisense RNA 1                                   | 1.81 | <0.01 |

|           |              |                                                           |       |       |
|-----------|--------------|-----------------------------------------------------------|-------|-------|
| 100500872 | MIR3911      | microRNA 3911                                             | 1.44  | 0.03  |
| 100505817 | LINC02582    | long intergenic non-protein coding RNA                    | 1.16  | <0.01 |
| 100507487 | LINC02615    | long intergenic non-protein coding RNA                    | 3.51  | <0.01 |
| 100533483 | DNAAF4-CCP   | DNAAF4-CCPG1 readthrough (NMD)                            | 1.3   | 0.01  |
| 101927501 | PINCR        | p53-induced noncoding RNA                                 | 1.6   | <0.01 |
| 102724788 | LOC102724788 | proline dehydrogenase 1, mitochondrial                    | 1.96  | <0.01 |
| 105379194 | LOC105379194 | uncharacterized LOC105379194                              | 1.57  | 0.05  |
| 10630     | PDPN         | podoplanin                                                | -5.85 | <0.01 |
| 109729169 | LINC02154    | long intergenic non-protein coding RNA                    | -4.66 | <0.01 |
| 51438     | MAGEC2       | MAGE family member C2                                     | -3.72 | <0.01 |
| 6262      | RYR2         | ryanodine receptor 2                                      | -3.35 | <0.01 |
| 392636    | AGMO         | alkylglycerol monooxygenase                               | -3.29 | <0.01 |
| 101928336 | LOC101928336 | uncharacterized LOC101928336                              | -3.23 | <0.01 |
| 5778      | PTPN7        | protein tyrosine phosphatase non-receptor                 | -3.18 | <0.01 |
| 57101     | ANO2         | anoctamin 2                                               | -3.15 | <0.01 |
| 388015    | RTL1         | retrotransposon Gag like 1                                | -3.11 | <0.01 |
| 445582    | POTEE        | POTE ankyrin domain family member E                       | -3.08 | <0.01 |
| 4620      | MYH2         | myosin heavy chain 2                                      | -2.96 | <0.01 |
| 969       | CD69         | CD69 molecule                                             | -2.96 | <0.01 |
| 7373      | COL14A1      | collagen type XIV alpha 1 chain                           | -2.95 | <0.01 |
| 286499    | FAM133A      | family with sequence similarity 133 member                | -2.91 | <0.01 |
| 3290      | HSD11B1      | hydroxysteroid 11-beta dehydrogenase 1                    | -2.89 | <0.01 |
| 440910    | LOC440910    | uncharacterized LOC440910                                 | -2.89 | <0.01 |
| 2567      | GABRG3       | gamma-aminobutyric acid type A receptor subunit gamma3    | -2.89 | <0.01 |
| 4118      | MAL          | mal, T cell differentiation protein                       | -2.85 | <0.01 |
| 339260    | LOC339260    | uncharacterized LOC339260                                 | -2.84 | <0.01 |
| 4619      | MYH1         | myosin heavy chain 1                                      | -2.83 | <0.01 |
| 7293      | TNFRSF4      | TNF receptor superfamily member 4                         | -2.81 | <0.01 |
| 100289574 | HERC2P4      | hect domain and RLD 2 pseudogene 4                        | -2.8  | <0.01 |
| 101927513 | LOC101927513 | uncharacterized LOC101927513                              | -2.72 | <0.01 |
| 56999     | ADAMTS9      | ADAM metallopeptidase with thrombospondin type 1 motif 9  | -2.72 | <0.01 |
| 10584     | COLEC10      | collectin subfamily member 10                             | -2.69 | <0.01 |
| 101927528 | LINC01204    | long intergenic non-protein coding RNA                    | -2.64 | <0.01 |
| 101928687 | LNCAROD      | lncRNA activating regulator of DKK1                       | -2.62 | <0.01 |
| 81792     | ADAMTS12     | ADAM metallopeptidase with thrombospondin type 1 motif 12 | -2.53 | <0.01 |
| 4318      | MMP9         | matrix metallopeptidase 9                                 | -2.52 | <0.01 |
| 3174      | HNF4G        | hepatocyte nuclear factor 4 gamma                         | -2.48 | <0.01 |
| 58        | ACTA1        | actin alpha 1, skeletal muscle                            | -2.46 | <0.01 |
| 440915    | POTEKP       | POTE ankyrin domain family member K, pseudogene           | -2.46 | <0.01 |
| 84856     | LINC00839    | long intergenic non-protein coding RNA 839                | -2.46 | <0.01 |
| 23636     | NUP62        | nucleoporin 62                                            | -2.38 | <0.01 |
| 9023      | CH25H        | cholesterol 25-hydroxylase                                | -2.37 | <0.01 |
| 441389    | LINC01239    | long intergenic non-protein coding RNA                    | -2.37 | <0.01 |

|           |            |                                                              |       |       |
|-----------|------------|--------------------------------------------------------------|-------|-------|
| 400110    | ANKRD20A19 | ankyrin repeat domain 20 family member A19, pseudogene       | -2.35 | <0.01 |
| 347468    | OR13H1     | olfactory receptor family 13 subfamily H member 1            | -2.28 | <0.01 |
| 3684      | ITGAM      | integrin subunit alpha M                                     | -2.28 | <0.01 |
| 3887      | KRT81      | keratin 81                                                   | -2.26 | <0.01 |
| 729298    | PCNPP3     | PEST containing nuclear protein                              | -2.24 | <0.01 |
| 728957    | ZNF705D    | zinc finger protein 705D                                     | -2.24 | <0.01 |
| 6098      | ROS1       | ROS proto-oncogene 1, receptor tyrosine                      | -2.24 | <0.01 |
| 402429    | KRT8P8     | keratin 8 pseudogene 8                                       | -2.21 | <0.01 |
| 5789      | PTPRD      | protein tyrosine phosphatase receptor type                   | -2.21 | <0.01 |
| 343450    | KCNT2      | potassium sodium-activated channel subfamily T member 2      | -2.18 | <0.01 |
| 58529     | MYOZ1      | myozenin 1                                                   | -2.17 | <0.01 |
| 101929222 | DISC1FP1   | DISC1 fusion partner 1                                       | -2.15 | <0.01 |
| 107075116 | MIR3142HG  | MIR3142 host gene                                            | -2.15 | <0.01 |
| 114548    | NLRP3      | NLR family pyrin domain containing 3                         | -2.15 | <0.01 |
| 55879     | GABRQ      | gamma-aminobutyric acid type A receptor subunit theta        | -2.14 | <0.01 |
| 4481      | MSR1       | macrophage scavenger receptor 1                              | -2.14 | <0.01 |
| 115701    | ALPK2      | alpha kinase 2                                               | -2.14 | <0.01 |
| 101928767 | LINC02328  | long intergenic non-protein coding RNA                       | -2.13 | 0.01  |
| 105369848 | LNCOG      | lncRNA osteogenesis associated                               | -2.12 | <0.01 |
| 8842      | PROM1      | prominin 1                                                   | -2.11 | <0.01 |
| 441461    | STX17-AS1  | STX17 antisense RNA 1                                        | -2.1  | 0.01  |
| 57393     | CLTRN      | collectrin, amino acid transport regulator                   | -2.1  | <0.01 |
| 644684    | BMS1P12    | BMS1 pseudogene 12                                           | -2.07 | <0.01 |
| 644100    | ARL14EPL   | ADP ribosylation factor like GTPase 14 effector protein like | -2.07 | <0.01 |
| 84561     | SLC12A8    | solute carrier family 12 member 8                            | -2.07 | <0.01 |
| 100873793 | PHF2P2     | PHD finger protein 2 pseudogene 2                            | -2.05 | <0.01 |
| 6489      | ST8SIA1    | ST8 alpha-N-acetyl-neuraminide alpha-2,8-sialyltransferase 1 | -2.05 | <0.01 |
| 4102      | MAGEA3     | MAGE family member A3                                        | -2.05 | <0.01 |
| 653089    | NaN        | NaN                                                          | -2.02 | <0.01 |
| 27283     | TINAG      | tubulointerstitial nephritis antigen                         | -2.02 | <0.01 |
| 1602      | DACH1      | dachshund family transcription factor 1                      | -2.01 | <0.01 |
| 51302     | CYP39A1    | cytochrome P450 family 39 subfamily A member 1               | -2.01 | <0.01 |
| 101928845 | LINC01842  | long intergenic non-protein coding RNA                       | -2    | <0.01 |
| 8745      | ADAM23     | ADAM metallopeptidase domain 23                              | -2    | <0.01 |
| 157695    | TDRP       | testis development related protein                           | -2    | <0.01 |
| 114827    | FHAD1      | forkhead associated phosphopeptide binding domain 1          | -1.99 | <0.01 |
| 344901    | OSTN       | osteocrin                                                    | -1.99 | <0.01 |
| 100874094 | ZNF197-AS1 | ZNF197 antisense RNA 1                                       | -1.98 | 0.05  |
| 101805492 | CASC9      | cancer susceptibility 9                                      | -1.97 | <0.01 |
| 387597    | ILDR2      | immunoglobulin like domain containing                        | -1.96 | <0.01 |



|           |           |                                                           |       |       |
|-----------|-----------|-----------------------------------------------------------|-------|-------|
| 2556      | GABRA3    | gamma-aminobutyric acid type A receptor subunit alpha3    | -1.94 | <0.01 |
| 116442    | RAB39B    | RAB39B, member RAS oncogene family                        | -1.94 | <0.01 |
| 80034     | CSRNP3    | cysteine and serine rich nuclear protein 3                | -1.94 | <0.01 |
| 654790    | PCP4L1    | Purkinje cell protein 4 like 1                            | -1.94 | 0.01  |
| 50617     | ATP6V0A4  | ATPase H <sup>+</sup> transporting V0 subunit a4          | -1.94 | <0.01 |
| 10761     | PLAC1     | placenta enriched 1                                       | -1.94 | 0.04  |
| 105372840 | LINC01694 | long intergenic non-protein coding RNA                    | -1.93 | <0.01 |
| 100216479 | FAR2P2    | fatty acyl-CoA reductase 2 pseudogene 2                   | -1.92 | <0.01 |
| 90161     | HS6ST2    | heparan sulfate 6-O-sulfotransferase 2                    | -1.92 | 0.01  |
| 7070      | THY1      | Thy-1 cell surface antigen                                | -1.92 | <0.01 |
| 9381      | OTOF      | otoferlin                                                 | -1.91 | <0.01 |
| 7456      | WIPF1     | WAS/WASL interacting protein family                       | -1.91 | 0.01  |
| 6503      | SLA       | Src like adaptor                                          | -1.91 | 0.03  |
| 114788    | CSMD3     | CUB and Sushi multiple domains 3                          | -1.9  | <0.01 |
| 55553     | SOX6      | SRY-box transcription factor 6                            | -1.89 | <0.01 |
| 157       | GRK3      | G protein-coupled receptor kinase 3                       | -1.88 | <0.01 |
| 4023      | LPL       | lipoprotein lipase                                        | -1.87 | <0.01 |
| 101928122 | LINC01483 | long intergenic non-protein coding RNA                    | -1.85 | <0.01 |
| 221687    | RNF182    | ring finger protein 182                                   | -1.85 | <0.01 |
| 7772      | ZNF229    | zinc finger protein 229                                   | -1.85 | <0.01 |
| 3575      | IL7R      | interleukin 7 receptor                                    | -1.83 | <0.01 |
| 170692    | ADAMTS18  | ADAM metallopeptidase with thrombospondin type 1 motif 18 | -1.83 | <0.01 |
| 100506465 | LINC01234 | long intergenic non-protein coding RNA                    | -1.83 | <0.01 |
| 54549     | SDK2      | sidekick cell adhesion molecule 2                         | -1.83 | <0.01 |
| 401115    | C4orf48   | chromosome 4 open reading frame 48                        | -1.81 | <0.01 |
| 5239      | PGM5      | phosphoglucomutase 5                                      | -1.8  | <0.01 |
| 100216001 | MANCR     | mitotically associated long non coding RNA                | -1.8  | <0.01 |
| 6101      | RP1       | RP1 axonemal microtubule associated                       | -1.8  | <0.01 |
| 7335      | UBE2V1    | ubiquitin conjugating enzyme E2 V1                        | -1.8  | <0.01 |
| 84176     | MYH16     | myosin heavy chain 16 pseudogene                          | -1.8  | <0.01 |
| 7490      | WT1       | WT1 transcription factor                                  | -1.79 | <0.01 |
| 284759    | SIRPB2    | signal regulatory protein beta 2                          | -1.79 | <0.01 |
| 3899      | AFF3      | AF4/FMR2 family member 3                                  | -1.78 | 0.04  |
| 157381    | LINC00964 | long intergenic non-protein coding RNA 964                | -1.77 | <0.01 |
| 5806      | PTX3      | pentraxin 3                                               | -1.77 | <0.01 |
| 6546      | SLC8A1    | solute carrier family 8 member A1                         | -1.76 | <0.01 |
| 391174    | FAM96AP2  | family with sequence similarity 96 member A pseudogene 2  | -1.76 | 0.01  |
| 54847     | SIDT1     | SID1 transmembrane family member 1                        | -1.76 | <0.01 |
| 80070     | ADAMTS20  | ADAM metallopeptidase with thrombospondin type 1 motif 20 | -1.76 | <0.01 |
| 3263      | HPX       | hemopexin                                                 | -1.75 | 0.02  |
| 8578      | SCARF1    | scavenger receptor class F member 1                       | -1.74 | <0.01 |
| 91133     | L3MBTL4   | L3MBTL histone methyl-lysine binding                      | -1.74 | <0.01 |
| 6422      | SFRP1     | secreted frizzled related protein 1                       | -1.74 | <0.01 |
| 1780      | DYNC111   | dynein cytoplasmic 1 intermediate chain 1                 | -1.74 | <0.01 |

|           |              |                                                                     |       |       |
|-----------|--------------|---------------------------------------------------------------------|-------|-------|
| 6328      | SCN3A        | sodium voltage-gated channel alpha                                  | -1.74 | <0.01 |
| 440854    | CAPN14       | calpain 14                                                          | -1.74 | <0.01 |
| 7526      | YES1P1       | YES1 pseudogene 1                                                   | -1.73 | <0.01 |
| 10082     | GPC6         | glypican 6                                                          | -1.73 | 0.03  |
| 9235      | IL32         | interleukin 32                                                      | -1.73 | <0.01 |
| 116372    | LYPD1        | LY6/PLAUR domain containing 1                                       | -1.73 | <0.01 |
| 645715    | EEF1A1P24    | eukaryotic translation elongation factor 1<br>alpha 1 pseudogene 24 | -1.72 | <0.01 |
| 1573      | CYP2J2       | cytochrome P450 family 2 subfamily J                                | -1.72 | <0.01 |
| 3694      | ITGB6        | integrin subunit beta 6                                             | -1.72 | <0.01 |
| 100506258 | LOC100506258 | uncharacterized LOC100506258                                        | -1.72 | 0.01  |
| 10330     | CNPY2        | canopy FGF signaling regulator 2                                    | -1.71 | <0.01 |
| 4886      | NPY1R        | neuropeptide Y receptor Y1                                          | -1.7  | <0.01 |
| 9723      | SEMA3E       | semaphorin 3E                                                       | -1.7  | <0.01 |
| 255130    | IGFBP7-AS1   | IGFBP7 antisense RNA 1                                              | -1.7  | 0.02  |
| 10878     | CFHR3        | complement factor H related 3                                       | -1.7  | 0.01  |
| 4101      | MAGEA2       | MAGE family member A2                                               | -1.69 | <0.01 |
| 23043     | TNIK         | TRAF2 and NCK interacting kinase                                    | -1.69 | <0.01 |
| 149773    | APCDD1L-DT   | APCDD1L divergent transcript                                        | -1.69 | <0.01 |
| 3936      | LCP1         | lymphocyte cytosolic protein 1                                      | -1.69 | <0.01 |
| 399942    | TUBAP2       | tubulin alpha pseudogene 2                                          | -1.69 | <0.01 |
| 7096      | TLR1         | toll like receptor 1                                                | -1.69 | 0.01  |
| 84251     | SGIP1        | SH3GL interacting endocytic adaptor 1                               | -1.67 | <0.01 |
| 283316    | CD163L1      | CD163 molecule like 1                                               | -1.67 | <0.01 |
| 1437      | CSF2         | colony stimulating factor 2                                         | -1.66 | <0.01 |
| 23705     | CADM1        | cell adhesion molecule 1                                            | -1.66 | <0.01 |
| 4311      | MME          | membrane metalloendopeptidase                                       | -1.65 | <0.01 |
| 2566      | GABRG2       | gamma-aminobutyric acid type A receptor<br>subunit gamma2           | -1.65 | 0.01  |
| 285382    | C3orf70      | chromosome 3 open reading frame 70                                  | -1.65 | 0.01  |
| 106479468 | RN7SL674P    | RNA, 7SL, cytoplasmic 674, pseudogene                               | -1.64 | <0.01 |
| 1879      | EBF1         | EBF transcription factor 1                                          | -1.62 | 0.01  |
| 100128055 | SMARCA5-AS   | SMARCA5 antisense RNA 1                                             | -1.62 | 0.02  |
| 50486     | G0S2         | G0/G1 switch 2                                                      | -1.62 | <0.01 |
| 776       | CACNA1D      | calcium voltage-gated channel subunit                               | -1.62 | <0.01 |
| 54830     | NUP62CL      | nucleoporin 62 C-terminal like                                      | -1.62 | 0.01  |
| 27342     | RABGEF1      | RAB guanine nucleotide exchange factor 1                            | -1.62 | <0.01 |
| 81406     | OR2W6P       | olfactory receptor family 2 subfamily W<br>member 6 pseudogene      | -1.62 | 0.01  |
| 80201     | HKDC1        | hexokinase domain containing 1                                      | -1.61 | 0.01  |
| 30061     | SLC40A1      | solute carrier family 40 member 1                                   | -1.61 | 0.03  |
| 27253     | PCDH17       | protocadherin 17                                                    | -1.6  | 0.01  |
| 5629      | PROX1        | prospero homeobox 1                                                 | -1.6  | <0.01 |
| 387104    | SOGA3        | SOGA family member 3                                                | -1.6  | <0.01 |
| 440905    | FAR2P1       | fatty acyl-CoA reductase 2 pseudogene 1                             | -1.59 | <0.01 |
| 101926925 | LINC01358    | long intergenic non-protein coding RNA                              | -1.59 | 0.01  |
| 81697     | OR2B2        | olfactory receptor family 2 subfamily B                             | -1.59 | 0.01  |
| 1794      | DOCK2        | dedicator of cytokinesis 2                                          | -1.58 | <0.01 |

|           |              |                                                               |       |       |
|-----------|--------------|---------------------------------------------------------------|-------|-------|
| 55799     | CACNA2D3     | calcium voltage-gated channel auxiliary subunit alpha2delta 3 | -1.58 | <0.01 |
| 723788    | MIG7         | mig-7                                                         | -1.57 | <0.01 |
| 102725191 | LOC102725191 | uncharacterized LOC102725191                                  | -1.57 | 0.02  |
| 81030     | ZBP1         | Z-DNA binding protein 1                                       | -1.57 | <0.01 |
| 53353     | LRP1B        | LDL receptor related protein 1B                               | -1.57 | 0.01  |
| 285051    | STPG4        | sperm-tail PG-rich repeat containing 4                        | -1.56 | 0.01  |
| 139716    | GAB3         | GRB2 associated binding protein 3                             | -1.56 | 0.01  |
| 400046    | LINC02389    | long intergenic non-protein coding RNA                        | -1.56 | <0.01 |
| 3439      | IFNA1        | interferon alpha 1                                            | -1.55 | 0.01  |
| 88        | ACTN2        | actinin alpha 2                                               | -1.55 | 0.02  |
| 641364    | SLC7A11-AS1  | SLC7A11 antisense RNA 1                                       | -1.55 | 0.01  |
| 3773      | KCNJ16       | potassium inwardly rectifying channel subfamily J member 16   | -1.55 | 0.01  |
| 95        | ACY1         | aminoacylase 1                                                | -1.54 | 0.01  |
| 9308      | CD83         | CD83 molecule                                                 | -1.54 | <0.01 |
| 4319      | MMP10        | matrix metalloproteinase 10                                   | -1.54 | <0.01 |
| 10202     | DHRS2        | dehydrogenase/reductase 2                                     | -1.54 | <0.01 |
| 100271871 | RBM22P2      | RNA binding motif protein 22 pseudogene 2                     | -1.54 | 0.04  |
| 1950      | EGF          | epidermal growth factor                                       | -1.53 | 0.01  |
| 8512      | MBL1P        | mannose binding lectin 1, pseudogene                          | -1.53 | 0.01  |
| 952       | CD38         | CD38 molecule                                                 | -1.52 | 0.02  |
| 3604      | TNFRSF9      | TNF receptor superfamily member 9                             | -1.52 | 0.01  |
| 9079      | LDB2         | LIM domain binding 2                                          | -1.51 | 0.01  |
| 27071     | DAPP1        | dual adaptor of phosphotyrosine and 3-phosphoinositides 1     | -1.51 | <0.01 |
| 6447      | SCG5         | secretogranin V                                               | -1.51 | 0.01  |
| 27112     | FAM155B      | family with sequence similarity 155 member                    | -1.51 | 0.01  |
| 8972      | MGAM         | maltase-glucoamylase                                          | -1.51 | 0.02  |
| 101101772 | LINC00601    | long intergenic non-protein coding RNA 601                    | -1.5  | 0.04  |
| 93986     | FOXP2        | forkhead box P2                                               | -1.49 | 0.01  |
| 221806    | VWDE         | von Willebrand factor D and EGF domains                       | -1.49 | <0.01 |
| 6916      | TBXAS1       | thromboxane A synthase 1                                      | -1.49 | <0.01 |
| 54084     | TSPEAR       | thrombospondin type laminin G domain and EAR repeats          | -1.49 | 0.03  |
| 3552      | IL1A         | interleukin 1 alpha                                           | -1.49 | <0.01 |
| 7837      | PXDN         | peroxidase                                                    | -1.48 | <0.01 |
| 10750     | GRAP         | GRB2 related adaptor protein                                  | -1.48 | 0.01  |
| 6326      | SCN2A        | sodium voltage-gated channel alpha                            | -1.48 | 0.01  |
| 4684      | NCAM1        | neural cell adhesion molecule 1                               | -1.48 | 0.02  |
| 100303491 | ZEB2-AS1     | ZEB2 antisense RNA 1                                          | -1.48 | 0.03  |
| 50940     | PDE11A       | phosphodiesterase 11A                                         | -1.47 | 0.02  |
| 63951     | DMRTA1       | DMRT like family A1                                           | -1.47 | 0.01  |
| 5764      | PTN          | pleiotrophin                                                  | -1.47 | 0.02  |
| 2591      | GALNT3       | polypeptide N-                                                | -1.47 | <0.01 |
| 647333    | NaN          | NaN                                                           | -1.47 | <0.01 |
| 153163    | MGC32805     | uncharacterized LOC153163                                     | -1.47 | 0.02  |
| 1903      | S1PR3        | sphingosine-1-phosphate receptor 3                            | -1.47 | 0.01  |

|           |           |                                                                  |       |       |
|-----------|-----------|------------------------------------------------------------------|-------|-------|
| 389903    | CSAG3     | CSAG family member 3                                             | -1.46 | <0.01 |
| 29119     | CTNNA3    | catenin alpha 3                                                  | -1.46 | <0.01 |
| 7075      | TIE1      | tyrosine kinase with immunoglobulin like and EGF like domains 1  | -1.46 | 0.03  |
| 154860    | FEZF1-AS1 | FEZF1 antisense RNA 1                                            | -1.46 | 0.02  |
| 131909    | FAM172BP  | family with sequence similarity 172 member B, pseudogene         | -1.46 | 0.03  |
| 101927311 | LINC02185 | long intergenic non-protein coding RNA                           | -1.45 | 0.03  |
| 131450    | CD200R1   | CD200 receptor 1                                                 | -1.45 | 0.01  |
| 10659     | CELF2     | CUGBP Elav-like family member 2                                  | -1.45 | 0.01  |
| 57408     | LRTM1     | leucine rich repeats and transmembrane domains 1                 | -1.44 | 0.03  |
| 340017    | LINC02433 | long intergenic non-protein coding RNA                           | -1.44 | 0.03  |
| 63876     | PKNOX2    | PBX/knotted 1 homeobox 2                                         | -1.44 | 0.02  |
| 866       | SERPINA6  | serpin family A member 6                                         | -1.43 | 0.02  |
| 730755    | KRTAP2-3  | keratin associated protein 2-3                                   | -1.43 | 0.01  |
| 8995      | TNFSF18   | TNF superfamily member 18                                        | -1.43 | 0.01  |
| 51191     | HERC5     | HECT and RLD domain containing E3 ubiquitin protein ligase 5     | -1.42 | <0.01 |
| 645668    | TUFMP1    | Tu translation elongation factor, mitochondrial pseudogene 1     | -1.42 | 0.03  |
| 54538     | ROBO4     | roundabout guidance receptor 4                                   | -1.42 | 0.03  |
| 375061    | FAM89A    | family with sequence similarity 89 member                        | -1.42 | 0.01  |
| 100132463 | CLDN24    | claudin 24                                                       | -1.41 | 0.03  |
| 7226      | TRPM2     | transient receptor potential cation channel subfamily M member 2 | -1.41 | 0.01  |
| 1520      | CTSS      | cathepsin S                                                      | -1.41 | <0.01 |
| 3553      | IL1B      | interleukin 1 beta                                               | -1.41 | <0.01 |
| 8840      | CCN4      | cellular communication network factor 4                          | -1.41 | 0.02  |
| 401138    | AMTN      | amelotin                                                         | -1.4  | 0.01  |
| 330       | BIRC3     | baculoviral IAP repeat containing 3                              | -1.4  | <0.01 |
| 116071    | BATF2     | basic leucine zipper ATF-like transcription                      | -1.4  | 0.01  |
| 55340     | GIMAP5    | GTPase, IMAP family member 5                                     | -1.4  | 0.02  |
| 10501     | SEMA6B    | semaphorin 6B                                                    | -1.39 | 0.03  |
| 6515      | SLC2A3    | solute carrier family 2 member 3                                 | -1.39 | <0.01 |
| 91461     | PKDCC     | protein kinase domain containing,                                | -1.39 | 0.02  |
| 645280    | SMPD4P1   | sphingomyelin phosphodiesterase 4 pseudogene 1                   | -1.39 | 0.02  |
| 2250      | FGF5      | fibroblast growth factor 5                                       | -1.39 | <0.01 |
| 100420259 | GDI2P2    | GDP dissociation inhibitor 2 pseudogene 2                        | -1.39 | 0.03  |
| 56133     | PCDHB2    | protocadherin beta 2                                             | -1.38 | 0.01  |
| 56892     | TCIM      | transcriptional and immune response                              | -1.38 | 0.01  |
| 115362    | GBP5      | guanylate binding protein 5                                      | -1.38 | 0.01  |
| 2719      | GPC3      | glypican 3                                                       | -1.38 | 0.03  |
| 50509     | COL5A3    | collagen type V alpha 3 chain                                    | -1.37 | 0.02  |
| 100128888 | RPSAP36   | ribosomal protein SA pseudogene 36                               | -1.37 | 0.03  |
| 85449     | KIAA1755  | KIAA1755                                                         | -1.37 | 0.04  |
| 645864    | MAGEB17   | MAGE family member B17                                           | -1.36 | 0.03  |

|           |              |                                                                          |       |       |
|-----------|--------------|--------------------------------------------------------------------------|-------|-------|
| 56156     | TEX13B       | testis expressed 13B                                                     | -1.36 | 0.03  |
| 348751    | FTCDNL1      | formiminotransferase cyclodeaminase N-terminal like                      | -1.36 | 0.04  |
| 27147     | DENND2A      | DENN domain containing 2A                                                | -1.35 | 0.01  |
| 100130418 | CECR7        | cat eye syndrome chromosome region, candidate 7                          | -1.34 | 0.03  |
| 5672      | PSG4         | pregnancy specific beta-1-glycoprotein 4                                 | -1.34 | 0.02  |
| 1768      | DNAH6        | dynein axonemal heavy chain 6                                            | -1.33 | 0.03  |
| 105376261 | TTLL11-IT1   | TTLL11 intronic transcript 1                                             | -1.33 | 0.04  |
| 257194    | NEGR1        | neuronal growth regulator 1                                              | -1.33 | <0.01 |
| 1837      | DTNA         | dystrobrevin alpha                                                       | -1.32 | 0.03  |
| 25780     | RASGRP3      | RAS guanyl releasing protein 3                                           | -1.31 | 0.02  |
| 4857      | NOVA1        | NOVA alternative splicing regulator 1                                    | -1.31 | 0.02  |
| 1850      | DUSP8        | dual specificity phosphatase 8                                           | -1.31 | 0.05  |
| 618       | BCYRN1       | brain cytoplasmic RNA 1                                                  | -1.31 | <0.01 |
| 102724094 | MUC12-AS1    | MUC12 antisense RNA 1                                                    | -1.31 | 0.03  |
| 129099    | CPSF1P1      | cleavage and polyadenylation specific factor 1 pseudogene 1              | -1.3  | 0.03  |
| 100132077 | LOC100132077 | uncharacterized LOC100132077                                             | -1.3  | 0.03  |
| 7124      | TNF          | tumor necrosis factor                                                    | -1.3  | <0.01 |
| 23475     | QPRT         | quinolinate phosphoribosyltransferase                                    | -1.3  | 0.02  |
| 408186    | OVOS         | alpha-2-macroglobulin like 1 pseudogene                                  | -1.3  | 0.04  |
| 3624      | INHBA        | inhibin subunit beta A                                                   | -1.3  | <0.01 |
| 53840     | TRIM34       | tripartite motif containing 34                                           | -1.29 | 0.03  |
| 100133612 | LINC01134    | long intergenic non-protein coding RNA                                   | -1.29 | 0.05  |
| 81704     | DOCK8        | dedicator of cytokinesis 8                                               | -1.29 | 0.02  |
| 646627    | LYPD8        | LY6/PLAUR domain containing 8                                            | -1.29 | 0.04  |
| 2925      | GRPR         | gastrin releasing peptide receptor                                       | -1.29 | 0.04  |
| 283008    | NUTM2E       | NUT family member 2E                                                     | -1.28 | 0.03  |
| 152404    | IGSF11       | immunoglobulin superfamily member 11                                     | -1.28 | 0.04  |
| 133396    | IL31RA       | interleukin 31 receptor A                                                | -1.28 | 0.04  |
| 5332      | PLCB4        | phospholipase C beta 4                                                   | -1.27 | 0.03  |
| 4208      | MEF2C        | myocyte enhancer factor 2C                                               | -1.27 | 0.02  |
| 255231    | MCOLN2       | mucolipin 2                                                              | -1.26 | 0.02  |
| 91543     | RSAD2        | radical S-adenosyl methionine domain containing 2                        | -1.26 | <0.01 |
| 3778      | KCNMA1       | potassium calcium-activated channel subfamily M alpha 1                  | -1.25 | 0.02  |
| 80310     | PDGFD        | platelet derived growth factor D                                         | -1.25 | 0.03  |
| 57580     | PREX1        | phosphatidylinositol-3,4,5-trisphosphate dependent Rac exchange factor 1 | -1.25 | 0.01  |
| 199920    | FYB2         | FYN binding protein 2                                                    | -1.24 | 0.05  |
| 10333     | TLR6         | toll like receptor 6                                                     | -1.24 | 0.02  |
| 344875    | COL6A4P1     | collagen type VI alpha 4 pseudogene 1                                    | -1.24 | 0.04  |
| 101927661 | LOC101927661 | uncharacterized LOC101927661                                             | -1.23 | 0.04  |
| 79674     | VEPH1        | ventricular zone expressed PH domain containing 1                        | -1.23 | 0.01  |
| 90139     | TSPAN18      | tetraspanin 18                                                           | -1.23 | 0.03  |

|           |             |                                                      |       |       |
|-----------|-------------|------------------------------------------------------|-------|-------|
| 9407      | TMPRSS11D   | transmembrane serine protease 11D                    | -1.23 | 0.04  |
| 4753      | NELL2       | neural EGFL like 2                                   | -1.23 | 0.03  |
| 1295      | COL8A1      | collagen type VIII alpha 1 chain                     | -1.22 | <0.01 |
| 51816     | ADA2        | adenosine deaminase 2                                | -1.22 | 0.05  |
| 51200     | CPA4        | carboxypeptidase A4                                  | -1.22 | <0.01 |
| 3800      | KIF5C       | kinesin family member 5C                             | -1.22 | <0.01 |
| 5157      | PDGFRL      | platelet derived growth factor receptor like         | -1.21 | 0.03  |
| 347716    | USP32P3     | ubiquitin specific peptidase 32 pseudogene           | -1.21 | 0.04  |
| 101928978 | LOC10192897 | uncharacterized LOC101928978                         | -1.21 | 0.04  |
| 401024    | FSIP2       | fibrous sheath interacting protein 2                 | -1.21 | 0.01  |
| 129607    | CMPK2       | cytidine/uridine monophosphate kinase 2              | -1.2  | <0.01 |
| 100288413 | ERVMER34-1  | endogenous retrovirus group MER34 member 1, envelope | -1.2  | 0.03  |
| 84141     | EVA1A       | eva-1 homolog A, regulator of programmed cell death  | -1.2  | <0.01 |
| 9734      | HDAC9       | histone deacetylase 9                                | -1.2  | 0.02  |
| 646208    | NUS1P2      | NUS1 pseudogene 2                                    | -1.2  | 0.03  |
| 646324    | LINC00607   | long intergenic non-protein coding RNA 607           | -1.2  | 0.05  |
| 9839      | ZEB2        | zinc finger E-box binding homeobox 2                 | -1.19 | <0.01 |
| 5452      | POU2F2      | POU class 2 homeobox 2                               | -1.19 | 0.03  |
| 2863      | GPR39       | G protein-coupled receptor 39                        | -1.19 | 0.03  |
| 200162    | SPAG17      | sperm associated antigen 17                          | -1.19 | 0.03  |
| 2191      | FAP         | fibroblast activation protein alpha                  | -1.19 | 0.04  |
| 9119      | KRT75       | keratin 75                                           | -1.18 | 0.01  |
| 10673     | TNFSF13B    | TNF superfamily member 13b                           | -1.17 | 0.04  |
| 8869      | ST3GAL5     | ST3 beta-galactoside alpha-2,3-sialyltransferase 5   | -1.17 | 0.01  |
| 57126     | CD177       | CD177 molecule                                       | -1.17 | 0.03  |
| 388       | RHOB        | ras homolog family member B                          | -1.17 | <0.01 |
| 6352      | CCL5        | C-C motif chemokine ligand 5                         | -1.16 | <0.01 |
| 23231     | SEL1L3      | SEL1L family member 3                                | -1.16 | <0.01 |
| 677847    | SNORA81     | small nucleolar RNA, H/ACA box 81                    | -1.15 | <0.01 |
| 3038      | HAS3        | hyaluronan synthase 3                                | -1.15 | <0.01 |
| 57105     | CYSLTR2     | cysteinyl leukotriene receptor 2                     | -1.14 | <0.01 |
| 101       | ADAM8       | ADAM metallopeptidase domain 8                       | -1.14 | <0.01 |
| 5896      | RAG1        | recombination activating 1                           | -1.13 | 0.04  |
| 9404      | LPXN        | leupaxin                                             | -1.13 | <0.01 |
| 27185     | DISC1       | DISC1 scaffold protein                               | -1.13 | 0.03  |
| 84659     | RNASE7      | ribonuclease A family member 7                       | -1.13 | 0.04  |
| 152573    | SHISA3      | shisa family member 3                                | -1.13 | 0.01  |
| 4111      | MAGEA12     | MAGE family member A12                               | -1.12 | <0.01 |
| 50944     | SHANK1      | SH3 and multiple ankyrin repeat domains 1            | -1.12 | 0.05  |
| 414899    | BLID        | BH3-like motif containing, cell death inducer        | -1.12 | 0.05  |
| 54033     | RBM11       | RNA binding motif protein 11                         | -1.12 | 0.04  |
| 79739     | TTL7        | tubulin tyrosine ligase like 7                       | -1.11 | 0.02  |
| 89795     | NAV3        | neuron navigator 3                                   | -1.11 | 0.02  |
| 4794      | NFKBIE      | NFKB inhibitor epsilon                               | -1.11 | 0.01  |
| 3075      | CFH         | complement factor H                                  | -1.11 | <0.01 |

|        |           |                                                                  |       |       |
|--------|-----------|------------------------------------------------------------------|-------|-------|
| 6364   | CCL20     | C-C motif chemokine ligand 20                                    | -1.11 | 0.01  |
| 63970  | TP53AIP1  | tumor protein p53 regulated apoptosis inducing protein 1         | -1.11 | 0.04  |
| 1435   | CSF1      | colony stimulating factor 1                                      | -1.11 | 0.01  |
| 8638   | OASL      | 2'-5'-oligoadenylate synthetase like                             | -1.1  | <0.01 |
| 51761  | ATP8A2    | ATPase phospholipid transporting 8A2                             | -1.1  | 0.01  |
| 85441  | HELZ2     | helicase with zinc finger 2                                      | -1.09 | <0.01 |
| 8482   | SEMA7A    | semaphorin 7A (John Milton Hagen blood                           | -1.09 | 0.01  |
| 8642   | DCHS1     | dachsous cadherin-related 1                                      | -1.09 | 0.05  |
| 7098   | TLR3      | toll like receptor 3                                             | -1.08 | 0.01  |
| 26851  | SNORD3B-1 | small nucleolar RNA, C/D box 3B-1                                | -1.08 | <0.01 |
| 8997   | KALRN     | kalirin RhoGEF kinase                                            | -1.07 | 0.05  |
| 11274  | USP18     | ubiquitin specific peptidase 18                                  | -1.07 | <0.01 |
| 5649   | RELN      | reelin                                                           | -1.07 | 0.01  |
| 828    | CAPS      | calcyphosine                                                     | -1.07 | <0.01 |
| 347    | APOD      | apolipoprotein D                                                 | -1.06 | 0.01  |
| 164312 | LRRN4     | leucine rich repeat neuronal 4                                   | -1.06 | 0.01  |
| 57559  | STAMBPL1  | STAM binding protein like 1                                      | -1.06 | 0.03  |
| 4599   | MX1       | MX dynamin like GTPase 1                                         | -1.05 | <0.01 |
| 3481   | IGF2      | insulin like growth factor 2                                     | -1.04 | <0.01 |
| 5099   | PCDH7     | protocadherin 7                                                  | -1.04 | <0.01 |
| 55287  | TMEM40    | transmembrane protein 40                                         | -1.03 | <0.01 |
| 23414  | ZFPM2     | zinc finger protein, FOG family member 2                         | -1.03 | 0.03  |
| 7367   | UGT2B17   | UDP glucuronosyltransferase family 2 member B17                  | -1.03 | 0.03  |
| 84059  | ADGRV1    | adhesion G protein-coupled receptor V1                           | -1.02 | 0.02  |
| 387845 | EEF1A1P16 | eukaryotic translation elongation factor 1 alpha 1 pseudogene 16 | -1.02 | 0.02  |
| 2706   | GJB2      | gap junction protein beta 2                                      | -1.02 | <0.01 |
| 2152   | F3        | coagulation factor III, tissue factor                            | -1.01 | <0.01 |
| 389136 | VGLL3     | vestigial like family member 3                                   | -1.01 | 0.01  |
| 8613   | PLPP3     | phospholipid phosphatase 3                                       | -1.01 | 0.01  |
| 80144  | FRAS1     | Fraser extracellular matrix complex subunit                      | -1    | 0.01  |
| 79683  | ZDHHC14   | zinc finger DHHC-type palmitoyltransferase                       | -1    | 0.05  |

**Supplementary Table 3.** Differentially expressed genes in NA13 DDR2 mouse model.

| EntrezID | Symbol  | Description                                                                             | shDDR2 vs. Ctrl |       |
|----------|---------|-----------------------------------------------------------------------------------------|-----------------|-------|
|          |         |                                                                                         | log2FC          | FDR   |
| 225642   | Grp     | gastrin releasing peptide                                                               | -2.96           | <0.01 |
| 11656    | Alas2   | aminolevulinic acid synthase 2, erythroid                                               | -2.57           | <0.01 |
| 15122    | Hba-a1  | hemoglobin alpha, adult chain 1                                                         | -2.51           | <0.01 |
| 217328   | Myo15b  | myosin XVB                                                                              | -2.42           | <0.01 |
| 12985    | Csf3    | colony stimulating factor 3 (granulocyte)                                               | -2.36           | <0.01 |
| 110257   | Hba-a2  | hemoglobin alpha, adult chain 2                                                         | -2.3            | <0.01 |
| 16165    | Il13ra2 | interleukin 13 receptor, alpha 2                                                        | -2.3            | <0.01 |
| 11687    | Alox15  | arachidonate 15-lipoxygenase                                                            | -2.28           | <0.01 |
| 11684    | Alox12  | arachidonate 12-lipoxygenase                                                            | -2.14           | <0.01 |
| 20311    | Cxcl5   | chemokine (C-X-C motif) ligand 5                                                        | -2.05           | <0.01 |
| 16017    | Ighg1   | immunoglobulin heavy constant gamma 1 (G1m marker)                                      | -2.04           | <0.01 |
| 217733   | Tmem63c | transmembrane protein 63c                                                               | -2              | 0.01  |
| 20310    | Cxcl2   | chemokine (C-X-C motif) ligand 2                                                        | -1.94           | <0.01 |
| 546144   | Wdr72   | WD repeat domain 72                                                                     | -1.86           | <0.01 |
| 228564   | Frmd5   | FERM domain containing 5                                                                | -1.84           | 0.03  |
| 14917    | Gucy2c  | guanylate cyclase 2c                                                                    | -1.84           | <0.01 |
| 26878    | B3galt2 | UDP-Gal:betaGlcNAc beta 1,3-galactosyltransferase, polypeptide 2                        | -1.81           | <0.01 |
| 216643   | Gabrp   | gamma-aminobutyric acid (GABA) A receptor, pi                                           | -1.76           | <0.01 |
| 19016    | Pparg   | peroxisome proliferator activated receptor gamma                                        | -1.74           | <0.01 |
| 330627   | Trim66  | tripartite motif-containing 66                                                          | -1.64           | 0.03  |
| 100727   | Ugt2b34 | UDP glucuronosyltransferase 2 family, polypeptide B34                                   | -1.6            | 0.04  |
| 15112    | Hao1    | hydroxyacid oxidase 1, liver                                                            | -1.6            | 0.04  |
| 21990    | Tph1    | tryptophan hydroxylase 1                                                                | -1.59           | 0.02  |
| 20202    | S100a9  | S100 calcium binding protein A9 (calgranulin B)                                         | -1.55           | <0.01 |
| 330122   | Cxcl3   | chemokine (C-X-C motif) ligand 3                                                        | -1.52           | <0.01 |
| 140919   | Slc17a6 | solute carrier family 17 (sodium-dependent inorganic phosphate cotransporter), member 6 | -1.51           | 0.01  |
| 12981    | Csf2    | colony stimulating factor 2 (granulocyte-macrophage)                                    | -1.5            | 0.05  |
| 11571    | Crisp1  | cysteine-rich secretory protein 1 odontogenesis associated                              | -1.49           | 0.03  |
| 381651   | Odaph   | phosphoprotein                                                                          | -1.49           | 0.01  |
| 11685    | Alox12e | arachidonate lipoxygenase, epidermal                                                    | -1.48           | <0.01 |
| 70918    | Nsun7   | NOL1/NOP2/Sun domain family, member 7                                                   | -1.43           | 0.05  |
| 16691    | Krt8    | keratin 8                                                                               | -1.43           | <0.01 |



|        |            |                                                                  |       |       |
|--------|------------|------------------------------------------------------------------|-------|-------|
| 53897  | Gal3st1    | galactose-3-O-sulfotransferase 1                                 | -1.42 | 0.03  |
| 72077  | Gcnt3      | glucosaminyl (N-acetyl) transferase 3, mucin type                | -1.38 | <0.01 |
| 16175  | Il1a       | interleukin 1 alpha                                              | -1.35 | <0.01 |
| 56221  | Ccl24      | chemokine (C-C motif) ligand 24                                  | -1.34 | <0.01 |
| 226610 | Fam78b     | family with sequence similarity 78, member B                     | -1.32 | 0.02  |
| 628324 | S100a2     | S100 calcium binding protein A2                                  | -1.32 | 0.03  |
| 18703  | Pigr       | polymeric immunoglobulin receptor                                | -1.32 | 0.03  |
| 53624  | Cldn7      | claudin 7                                                        | -1.31 | <0.01 |
| 20297  | Ccl20      | chemokine (C-C motif) ligand 20                                  | -1.31 | 0.04  |
| 17384  | Mmp10      | matrix metalloproteinase 10                                      | -1.3  | <0.01 |
| 14600  | Ghr        | growth hormone receptor                                          | -1.3  | <0.01 |
| 18413  | Osm        | oncostatin M                                                     | -1.29 | 0.04  |
| 21946  | Pglyrp1    | peptidoglycan recognition protein 1                              | -1.29 | <0.01 |
| 22249  | Unc13b     | unc-13 homolog B                                                 | -1.27 | 0.05  |
| 20755  | Sprp2a1    | small proline-rich protein 2A1                                   | -1.25 | <0.01 |
| 12351  | Car4       | carbonic anhydrase 4                                             | -1.25 | 0.03  |
| 114142 | Foxp2      | forkhead box P2                                                  | -1.24 | 0.03  |
| 17002  | Ltf        | lactotransferrin                                                 | -1.24 | <0.01 |
| 17829  | Muc1       | mucin 1, transmembrane                                           | -1.22 | <0.01 |
| 14825  | Cxcl1      | chemokine (C-X-C motif) ligand 1                                 | -1.19 | <0.01 |
| 14133  | Fcna       | ficolin A                                                        | -1.18 | 0.03  |
| 57349  | Ppbp       | pro-platelet basic protein                                       | -1.16 | 0.03  |
| 70894  | Efcab3     | EF-hand calcium binding domain 3                                 | -1.16 | 0.03  |
| 110310 | Krt7       | keratin 7                                                        | -1.15 | <0.01 |
| 69993  | Chn2       | chimerin 2                                                       | -1.15 | 0.03  |
| 70350  | Basp1      | brain abundant, membrane attached signal protein 1               | -1.15 | <0.01 |
| 93961  | B3galt5    | UDP-Gal:betaGlcNAc beta 1,3-galactosyltransferase, polypeptide 5 | -1.14 | <0.01 |
| 22317  | Vamp1      | vesicle-associated membrane protein 1                            | -1.14 | 0.01  |
| 78906  | Misp       | mitotic spindle positioning                                      | -1.13 | 0.04  |
| 66889  | Rnf128     | ring finger protein 128                                          | -1.1  | 0.01  |
| 213948 | Atg9b      | autophagy related 9B                                             | -1.09 | <0.01 |
| 72269  | Cda        | cytidine deaminase                                               | -1.09 | 0.05  |
| 13522  | Adam28     | a disintegrin and metalloproteinase domain 28                    | -1.08 | 0.01  |
| 70835  | Prss22     | protease, serine 22                                              | -1.08 | 0.01  |
| 56312  | Nupr1      | nuclear protein transcription regulator 1                        | -1.06 | <0.01 |
| 16669  | Krt19      | keratin 19                                                       | -1.03 | <0.01 |
| 20201  | S100a8     | S100 calcium binding protein A8 (calgranulin A)                  | -1    | 0.02  |
| 18295  | Ogn        | osteoglycin                                                      | 1.01  | 0.05  |
| 14590  | Ggh        | gamma-glutamyl hydrolase                                         | 1.01  | <0.01 |
| 69542  | 2300002M23 | RIKEN cDNA 2300002M23 gene                                       | 1.02  | 0.04  |
| 259277 | Klk8       | kallikrein related-peptidase 8                                   | 1.03  | <0.01 |

|        |                                                                            |      |       |
|--------|----------------------------------------------------------------------------|------|-------|
|        | ATP binding cassette subfamily G                                           |      |       |
| 26357  | Abcg2 member 2 (Junior blood group)                                        | 1.03 | 0.01  |
| 219151 | Scara3 scavenger receptor class A, member 3                                | 1.03 | 0.03  |
| 66469  | Prxl2b peroxiredoxin like 2B                                               | 1.05 | 0.02  |
| 27357  | Gyg glycogenin                                                             | 1.06 | 0.02  |
|        | proline arginine-rich end leucine-rich repeat                              |      |       |
| 116847 | Prelp                                                                      | 1.06 | 0.01  |
|        | cartilage intermediate layer protein, nucleotide pyrophosphohydrolase      |      |       |
| 214425 | Cilp                                                                       | 1.07 | <0.01 |
| 14178  | Fgf7 fibroblast growth factor 7                                            | 1.08 | 0.01  |
| 71932  | Ephx3 epoxide hydrolase 3                                                  | 1.08 | 0.04  |
|        | sushi, von Willebrand factor type A, EGF and pentraxin domain containing 1 |      |       |
| 64817  | Svep1                                                                      | 1.09 | <0.01 |
| 59091  | Jph2 junctophilin 2                                                        | 1.1  | 0.01  |
|        | keratinocyte differentiation associated protein                            |      |       |
| 64661  | Krtdap                                                                     | 1.1  | <0.01 |
|        | calcium channel, voltage-dependent, beta 1 subunit                         |      |       |
| 12295  | Cacnb1                                                                     | 1.11 | 0.05  |
| 17189  | Mb myoglobin                                                               | 1.13 | 0.02  |
| 22403  | Ccn5 cellular communication network factor 5                               | 1.15 | <0.01 |
|        | integrin beta 3 binding protein (beta3-endonexin)                          |      |       |
| 67733  | Itgb3bp                                                                    | 1.15 | 0.05  |
| 16661  | Krt10 keratin 10                                                           | 1.17 | <0.01 |
| 240633 | Lipk lipase, family member K                                               | 1.17 | <0.01 |
| 11790  | Speg SPEG complex locus                                                    | 1.17 | 0.03  |
|        | FXYP domain-containing ion transport regulator 1                           |      |       |
| 56188  | Fxyd1                                                                      | 1.17 | 0.05  |
| 80892  | Zfhx4 zinc finger homeodomain 4                                            | 1.17 | 0.02  |
| 23796  | Aplnr apelin receptor                                                      | 1.21 | <0.01 |
| 66283  | Gkn1 gastroke 1                                                            | 1.22 | 0.01  |
|        | 4short chain dehydrogenase/reductase family 9C, member 7                   |      |       |
| 70061  | Sdr9c7                                                                     | 1.23 | 0.01  |
| 22239  | Ugt8a UDP galactosyltransferase 8A                                         | 1.24 | 0.03  |
| 16678  | Krt1 keratin 1                                                             | 1.24 | <0.01 |
| 12773  | Ccr4 chemokine (C-C motif) receptor 4                                      | 1.25 | <0.01 |
| 14264  | Fmod fibromodulin                                                          | 1.26 | <0.01 |
| 20459  | Ptk6 PTK6 protein tyrosine kinase 6                                        | 1.27 | 0.04  |
| 626870 | Gm11992 predicted gene 11992                                               | 1.27 | 0.03  |
| 12491  | Cd36 CD36 molecule                                                         | 1.29 | <0.01 |
|        | ribonuclease, RNase A family, 1 (pancreatic)                               |      |       |
| 19752  | Rnase1                                                                     | 1.29 | 0.04  |
| 74055  | Plce1 phospholipase C, epsilon 1                                           | 1.29 | 0.04  |
| 56437  | Rrad Ras-related associated with diabetes                                  | 1.3  | 0.01  |
| 216049 | Zfp365 zinc finger protein 365                                             | 1.31 | 0.02  |
|        | fatty acid binding protein 3, muscle and heart                             |      |       |
| 14077  | Fabp3                                                                      | 1.32 | 0.05  |

|        |            |                                                                                                 |      |       |
|--------|------------|-------------------------------------------------------------------------------------------------|------|-------|
| 16531  | Kcma1      | potassium large conductance calcium-activated channel, subfamily M, alpha member 1              | 1.34 | 0.03  |
| 52250  | Reep1      | receptor accessory protein 1                                                                    | 1.34 | 0.02  |
| 105298 | Epdr1      | ependymin related protein 1 (zebrafish)                                                         | 1.34 | 0.02  |
| 118449 | Synpo2     | synaptopodin 2                                                                                  | 1.35 | 0.01  |
| 11807  | Apoa2      | apolipoprotein A-II                                                                             | 1.36 | 0.05  |
| 16002  | Igf2       | insulin-like growth factor 2                                                                    | 1.37 | <0.01 |
| 108897 | Aif1l      | allograft inflammatory factor 1-like                                                            | 1.37 | 0.02  |
| 14051  | Eya4       | EYA transcriptional coactivator and phosphatase 4                                               | 1.37 | 0.04  |
| 282619 | Sbsn       | suprabasin                                                                                      | 1.38 | <0.01 |
| 435529 | Adgrf2     | adhesion G protein-coupled receptor F2                                                          | 1.39 | 0.02  |
| 12338  | Capn6      | calpain 6                                                                                       | 1.39 | 0.05  |
| 22370  | Vtn        | vitronectin                                                                                     | 1.39 | 0.04  |
| 243912 | Hspb6      | heat shock protein, alpha-crystallin-related, B6                                                | 1.39 | <0.01 |
| 20129  | Rptn       | repetin                                                                                         | 1.4  | <0.01 |
| 386463 | Cdsn       | corneodesmosin                                                                                  | 1.4  | <0.01 |
| 68828  | Sync       | syncoilin                                                                                       | 1.41 | 0.03  |
| 244198 | Olfml1     | olfactomedin-like 1                                                                             | 1.42 | 0.05  |
| 11537  | Cfd        | complement factor D (adipsin)                                                                   | 1.42 | 0.04  |
| 209378 | Itih5      | inter-alpha (globulin) inhibitor H5                                                             | 1.44 | <0.01 |
| 12335  | Capn3      | calpain 3                                                                                       | 1.46 | 0.01  |
| 19011  | Endou      | endonuclease, polyU-specific                                                                    | 1.46 | <0.01 |
| 21952  | Tnni1      | troponin I, skeletal, slow 1                                                                    | 1.49 | <0.01 |
| 241113 | Prkag3     | protein kinase, AMP-activated, gamma 3 non-catalytic subunit                                    | 1.49 | 0.02  |
| 14199  | Fhl1       | four and a half LIM domains 1                                                                   | 1.5  | <0.01 |
| 101533 | Klk9       | kallikrein related-peptidase 9                                                                  | 1.5  | <0.01 |
| 109314 | Prr9       | proline rich 9                                                                                  | 1.5  | <0.01 |
| 76942  | Lypd5      | Ly6/Plaur domain containing 5                                                                   | 1.5  | <0.01 |
| 21922  | Clec3b     | C-type lectin domain family 3, member b transmembrane and tetratricopeptide repeat containing 1 | 1.52 | <0.01 |
| 387314 | Tmtc1      | repeat containing 1                                                                             | 1.52 | 0.01  |
| 626048 | Rps12-ps16 | ribosomal protein S12, pseudogene 16                                                            | 1.53 | 0.03  |
| 75572  | Acyp2      | acylphosphatase 2, muscle type                                                                  | 1.53 | 0.01  |
| 239853 | Adgrg7     | adhesion G protein-coupled receptor G7                                                          | 1.53 | <0.01 |
| 73230  | Bmper      | BMP-binding endothelial regulator                                                               | 1.54 | 0.01  |
| 74116  | Pi16       | peptidase inhibitor 16                                                                          | 1.54 | <0.01 |
| 67516  | Kctd4      | potassium channel tetramerisation domain containing 4                                           | 1.55 | 0.01  |
| 20289  | Scx        | scleraxis                                                                                       | 1.57 | 0.01  |
| 225638 | Alpk2      | alpha-kinase 2                                                                                  | 1.57 | 0.02  |
| 13482  | Dpp4       | dipeptidylpeptidase 4                                                                           | 1.58 | 0.01  |
| 639634 | Aadacl2    | arylacetamide deacetylase like 2                                                                | 1.58 | 0.01  |
| 320040 | Rnf222     | ring finger protein 222                                                                         | 1.59 | 0.01  |

|        |           |                                                                                |      |       |
|--------|-----------|--------------------------------------------------------------------------------|------|-------|
| 17260  | Mef2c     | myocyte enhancer factor 2C                                                     | 1.59 | <0.01 |
| 433091 | Pnpla1    | patatin-like phospholipase domain containing 1                                 | 1.59 | 0.01  |
| 232413 | Clec12a   | C-type lectin domain family 12, member a                                       | 1.59 | 0.01  |
| 21908  | Tlx1      | T cell leukemia, homeobox 1                                                    | 1.59 | 0.02  |
| 19713  | Ret       | ret proto-oncogene                                                             | 1.6  | 0.02  |
| 16716  | Ky        | kyphoscoliosis peptidase                                                       | 1.6  | 0.05  |
| 71755  | Dhdh      | dihydrodiol dehydrogenase (dimeric)                                            | 1.61 | 0.01  |
| 216961 | Coro6     | coronin 6                                                                      | 1.62 | 0.02  |
| 57911  | Gsdma     | gasdermin A                                                                    | 1.62 | <0.01 |
| 94045  | P2rx5     | purinergic receptor P2X, ligand-gated ion channel, 5                           | 1.64 | 0.03  |
| 242642 | HpdI      | 4-hydroxyphenylpyruvate dioxygenase-like                                       | 1.66 | 0.05  |
| 12845  | Comp      | cartilage oligomeric matrix protein                                            | 1.67 | 0.03  |
| 16515  | Kcnj12    | potassium inwardly-rectifying channel, subfamily J, member 12                  | 1.67 | 0.01  |
| 27494  | Amot      | angiominin                                                                     | 1.68 | <0.01 |
| 320590 | Svopl     | SV2 related protein homolog (rat)-like                                         | 1.7  | 0.04  |
| 194597 | Tmprss11a | transmembrane protease, serine 11a                                             | 1.7  | <0.01 |
| 73284  | Ddit4l    | DNA-damage-inducible transcript 4-like                                         | 1.7  | 0.02  |
| 52187  | Rragd     | Ras-related GTP binding D                                                      | 1.71 | <0.01 |
| 72607  | Usp13     | ubiquitin specific peptidase 13 (isopeptidase T-3)                             | 1.72 | <0.01 |
| 24004  | Rai2      | retinoic acid induced 2                                                        | 1.73 | 0.04  |
| 14025  | Bcl11a    | B cell CLL/lymphoma 11A (zinc finger protein)                                  | 1.76 | <0.01 |
| 12955  | Cryab     | crystallin, alpha B                                                            | 1.77 | <0.01 |
| 54159  | Rnase2b   | ribonuclease, RNase A family, 2B (liver, eosinophil-derived neurotoxin)        | 1.78 | <0.01 |
| 15451  | Hpn       | hepsin                                                                         | 1.78 | <0.01 |
| 15360  | Hmgcs2    | 3-hydroxy-3-methylglutaryl-Coenzyme A synthase 2                               | 1.79 | 0.03  |
| 216616 | Efemp1    | epidermal growth factor-containing fibulin-like extracellular matrix protein 1 | 1.83 | <0.01 |
| 20339  | Sele      | selectin, endothelial cell                                                     | 1.84 | 0.03  |
| 237611 | Stac3     | SH3 and cysteine rich domain 3                                                 | 1.85 | <0.01 |
| 80796  | Calm4     | calmodulin 4                                                                   | 1.85 | <0.01 |
| 233335 | Synm      | synemin, intermediate filament protein                                         | 1.87 | <0.01 |
| 11932  | Atp1b2    | ATPase, Na <sup>+</sup> /K <sup>+</sup> transporting, beta 2 polypeptide       | 1.87 | <0.01 |
| 16500  | Kcnb1     | potassium voltage gated channel, Shab-related subfamily, member 1              | 1.87 | <0.01 |
| 11812  | Apoc1     | apolipoprotein C-I                                                             | 1.89 | <0.01 |
| 74175  | Crct1     | cysteine-rich C-terminal 1                                                     | 1.91 | <0.01 |
| 74407  | Ttc25     | tetratricopeptide repeat domain 25                                             | 1.94 | 0.02  |
| 59006  | Myoz2     | myozenin 2                                                                     | 1.96 | <0.01 |

|           |          |                                                                                                   |      |       |
|-----------|----------|---------------------------------------------------------------------------------------------------|------|-------|
| 399548    | Scn4b    | sodium channel, type IV, beta                                                                     | 1.96 | <0.01 |
| 81877     | Tnxb     | tenascin XB                                                                                       | 1.96 | <0.01 |
| 69253     | Hspb2    | heat shock protein 2                                                                              | 1.99 | <0.01 |
| 107765    | Ankrd1   | ankyrin repeat domain 1 (cardiac muscle)<br>calcium/calmodulin-dependent protein                  | 1.99 | <0.01 |
| 12323     | Camk2b   | kinase II, beta                                                                                   | 2    | <0.01 |
| 142687    | Asb14    | ankyrin repeat and SOCS box-containing<br>14                                                      | 2    | 0.01  |
| 12160     | Bmp5     | bone morphogenetic protein 5                                                                      | 2.01 | 0.01  |
| 54403     | Slc4a4   | solute carrier family 4 (anion exchanger),<br>member 4                                            | 2.04 | <0.01 |
| 18670     | Abcb4    | ATP-binding cassette, sub-family B<br>(MDR/TAP), member 4                                         | 2.04 | <0.01 |
| 239134    | Gucy1b2  | guanylate cyclase 1, soluble, beta 2                                                              | 2.05 | <0.01 |
| 21828     | Thbs4    | thrombospondin 4                                                                                  | 2.06 | <0.01 |
| 74165     | Fbxl22   | F-box and leucine-rich repeat protein 22                                                          | 2.07 | <0.01 |
| 100302565 | Snord68  | small nucleolar RNA, C/D box 68                                                                   | 2.11 | 0.04  |
| 382864    | Colq     | collagen-like tail subunit (single strand of<br>homotrimer) of asymmetric<br>acetylcholinesterase | 2.12 | <0.01 |
| 27389     | Dusp13   | dual specificity phosphatase 13                                                                   | 2.19 | <0.01 |
| 17896     | Myl4     | myosin, light polypeptide 4                                                                       | 2.22 | <0.01 |
| 17751     | Mt3      | metallothionein 3                                                                                 | 2.24 | <0.01 |
| 22229     | Ucp3     | uncoupling protein 3 (mitochondrial,<br>proton carrier)                                           | 2.25 | <0.01 |
| 67855     | Asprv1   | aspartic peptidase, retroviral-like 1                                                             | 2.26 | <0.01 |
| 433619    | Kprp     | keratinocyte expressed, proline-rich                                                              | 2.26 | <0.01 |
| 384061    | Fndc5    | fibronectin type III domain containing 5                                                          | 2.29 | <0.01 |
| 17879     | Myh1     | myosin, heavy polypeptide 1, skeletal<br>muscle, adult                                            | 2.32 | <0.01 |
| 56012     | Pgam2    | phosphoglycerate mutase 2                                                                         | 2.32 | <0.01 |
| 217012    | Unc45b   | unc-45 myosin chaperone B                                                                         | 2.34 | <0.01 |
| 26549     | Itgb1bp2 | integrin beta 1 binding protein 2                                                                 | 2.34 | <0.01 |
| 68794     | Flnc     | filamin C, gamma                                                                                  | 2.36 | <0.01 |
| 20568     | Slpi     | secretory leukocyte peptidase inhibitor                                                           | 2.36 | <0.01 |
| 73720     | Cst6     | cystatin E/M                                                                                      | 2.37 | <0.01 |
| 106393    | Srl      | sarcalumenin                                                                                      | 2.38 | <0.01 |
| 17929     | Myom1    | myomesin 1                                                                                        | 2.43 | <0.01 |
| 14955     | H19      | H19, imprinted maternally expressed<br>transcript                                                 | 2.44 | <0.01 |
| 65256     | Asb2     | ankyrin repeat and SOCS box-containing<br>2                                                       | 2.45 | <0.01 |
| 225443    | Gm94     | predicted gene 94                                                                                 | 2.49 | <0.01 |
| 11464     | Actc1    | actin, alpha, cardiac muscle 1                                                                    | 2.51 | <0.01 |
| 74249     | Lrrc2    | leucine rich repeat containing 2                                                                  | 2.56 | <0.01 |
| 231148    | Ablim2   | actin-binding LIM protein 2                                                                       | 2.58 | <0.01 |
| 21955     | Tnnt1    | troponin T1, skeletal, slow                                                                       | 2.59 | <0.01 |

|        |         |                                                                           |      |       |
|--------|---------|---------------------------------------------------------------------------|------|-------|
| 26971  | Pla2g2f | phospholipase A2, group IIF                                               | 2.61 | <0.01 |
| 69520  | Lce3f   | late cornified envelope 3F                                                | 2.64 | <0.01 |
| 21924  | Tnnc1   | troponin C, cardiac/slow skeletal                                         | 2.74 | <0.01 |
| 17349  | Mlf1    | myeloid leukemia factor 1                                                 | 2.74 | <0.01 |
| 378431 | Txlnb   | taxilin beta                                                              | 2.74 | <0.01 |
| 24052  | Sgcd    | sarcoglycan, delta (dystrophin-associated glycoprotein)                   | 2.77 | <0.01 |
| 12322  | Camk2a  | calcium/calmodulin-dependent protein kinase II alpha                      | 2.79 | <0.01 |
| 70788  | Klhl30  | kelch-like 30                                                             | 2.86 | <0.01 |
| 69354  | Slc38a4 | solute carrier family 38, member 4                                        | 2.88 | <0.01 |
| 15464  | Hrc     | histidine rich calcium binding protein                                    | 2.9  | <0.01 |
| 12350  | Car3    | carbonic anhydrase 3                                                      | 2.98 | <0.01 |
| 13505  | Dsc1    | desmocollin 1                                                             | 3    | <0.01 |
| 23993  | Klk7    | kallikrein related-peptidase 7 (chymotryptic, stratum corneum)            | 3    | <0.01 |
| 14555  | Gpd1    | glycerol-3-phosphate dehydrogenase 1 (soluble)                            | 3.02 | <0.01 |
| 68854  | Asb11   | ankyrin repeat and SOCS box-containing 11                                 | 3.03 | <0.01 |
| 98660  | Atp1a2  | ATPase, Na <sup>+</sup> /K <sup>+</sup> transporting, alpha 2 polypeptide | 3.08 | <0.01 |
| 11811  | Apobec2 | apolipoprotein B mRNA editing enzyme, catalytic polypeptide 2             | 3.1  | <0.01 |
| 50874  | Tmod4   | tropomodulin 4                                                            | 3.12 | <0.01 |
| 13346  | Des     | desmin                                                                    | 3.12 | <0.01 |
| 241431 | Xirp2   | xin actin-binding repeat containing 2                                     | 3.12 | <0.01 |
| 78321  | Ankrd23 | ankyrin repeat domain 23                                                  | 3.15 | <0.01 |
| 13808  | Eno3    | enolase 3, beta muscle                                                    | 3.25 | <0.01 |
| 434246 | Trim72  | tripartite motif-containing 72                                            | 3.27 | <0.01 |
| 67252  | Cap2    | CAP, adenylate cyclase-associated protein, 2 (yeast)                      | 3.32 | <0.01 |
| 22138  | Ttn     | titin                                                                     | 3.39 | <0.01 |
| 18767  | Pkia    | protein kinase inhibitor, alpha                                           | 3.47 | <0.01 |
| 12292  | Cacna1s | calcium channel, voltage-dependent, L type, alpha 1S subunit              | 3.48 | <0.01 |
| 240892 | Dusp27  | dual specificity phosphatase 27 (putative)                                | 3.51 | <0.01 |
| 21953  | Tnni2   | troponin I, skeletal, fast 2                                              | 3.57 | <0.01 |
| 53412  | Ppp1r3c | protein phosphatase 1, regulatory subunit 3C                              | 3.6  | <0.01 |
| 228003 | Klhl41  | kelch-like 41                                                             | 3.6  | <0.01 |
| 18682  | Phkg1   | phosphorylase kinase gamma 1                                              | 3.63 | <0.01 |
| 20190  | Ryr1    | ryanodine receptor 1, skeletal muscle                                     | 3.64 | <0.01 |
| 21818  | Tgm3    | transglutaminase 3, E polypeptide                                         | 3.64 | <0.01 |
| 12299  | Cacng1  | calcium channel, voltage-dependent, gamma subunit 1                       | 3.68 | <0.01 |
| 17996  | Neb     | nebulin                                                                   | 3.79 | <0.01 |

|        |        |                                                                         |      |       |
|--------|--------|-------------------------------------------------------------------------|------|-------|
| 29818  | Hspb7  | heat shock protein family, member 7<br>(cardiovascular)                 | 3.86 | <0.01 |
| 53318  | Pdlim3 | PDZ and LIM domain 3                                                    | 3.93 | <0.01 |
| 50795  | Sh3bgr | SH3-binding domain glutamic acid-rich<br>protein                        | 3.97 | <0.01 |
| 17907  | Mylpf  | myosin light chain, phosphorylatable, fast<br>skeletal muscle           | 3.98 | <0.01 |
| 229665 | Ampd1  | adenosine monophosphate deaminase 1                                     | 4.01 | <0.01 |
| 11733  | Ank1   | ankyrin 1, erythroid                                                    | 4.07 | <0.01 |
| 24131  | Ldb3   | LIM domain binding 3                                                    | 4.13 | <0.01 |
| 66175  | Mustn1 | musculoskeletal, embryonic nuclear<br>protein 1                         | 4.15 | <0.01 |
| 17901  | Myl1   | myosin, light polypeptide 1                                             | 4.22 | <0.01 |
| 12372  | Casq1  | calsequestrin 1                                                         | 4.25 | <0.01 |
| 11459  | Acta1  | actin, alpha 1, skeletal muscle                                         | 4.44 | <0.01 |
| 18175  | Nrap   | nebulin-related anchoring protein                                       | 4.54 | <0.01 |
| 22437  | Xirp1  | xin actin-binding repeat containing 1                                   | 4.61 | <0.01 |
| 21925  | Tnnc2  | troponin C2, fast                                                       | 4.7  | <0.01 |
| 76469  | Cmya5  | cardiomyopathy associated 5                                             | 4.74 | <0.01 |
| 11474  | Actn3  | actinin alpha 3                                                         | 4.74 | <0.01 |
| 21957  | Tnnt3  | troponin T3, skeletal, fast                                             | 4.78 | <0.01 |
| 27273  | Pdk4   | pyruvate dehydrogenase kinase,<br>isoenzyme 4                           | 4.96 | <0.01 |
| 19309  | Pygm   | muscle glycogen phosphorylase                                           | 5.19 | <0.01 |
| 11937  | Atp2a1 | ATPase, Ca <sup>++</sup> transporting, cardiac<br>muscle, fast twitch 1 | 5.54 | <0.01 |
| 19293  | Pvalb  | parvalbumin                                                             | 5.55 | <0.01 |
| 12715  | Ckm    | creatine kinase, muscle                                                 | 6.03 | <0.01 |
| 17884  | Myh4   | myosin, heavy polypeptide 4, skeletal<br>muscle                         | 6.92 | <0.01 |

---

**Supplementary Table 4.** Clinical characteristics for the Tempus and Caris non-small cell lung cancer datasets treated with immune checkpoint blockade.

| <b>Characteristic</b>                                                                                                                      | <b>Caris</b>  | <b>Tempus</b> |
|--------------------------------------------------------------------------------------------------------------------------------------------|---------------|---------------|
| <b>No. of patients</b>                                                                                                                     | 259           | 196           |
| <b>Age, Median, years (range)</b>                                                                                                          | 67 (36-89)    | 67 (26-90)    |
| <b>Sex, male, n (%)</b>                                                                                                                    | 136 (52)      | 95 (48)       |
| <b>Race, Non-Hispanic White n (%)</b>                                                                                                      | not available | 106 (54)      |
| <b>Site of primary tumor, n (%)</b>                                                                                                        |               |               |
| Lung                                                                                                                                       | 259 (100)     | 196 (100)     |
|                                                                                                                                            |               |               |
| <b>ECOG PS, n (%)</b>                                                                                                                      |               |               |
| 0                                                                                                                                          | not available | 19 (10)       |
| 1                                                                                                                                          | not available | 36 (18)       |
| Other (2,3,4)                                                                                                                              | not available | 21 (11)       |
| Unknown                                                                                                                                    | not available | 120 (61)      |
| <b>Tobacco use, n (%)</b>                                                                                                                  |               |               |
| Current                                                                                                                                    | not available | 38 (19)       |
| Never                                                                                                                                      | not available | 30 (15)       |
| Previous                                                                                                                                   | not available | 110 (56)      |
| Unknown                                                                                                                                    | not available | 18 (9)        |
| <b>Metastatic sites at baseline, n (%)</b>                                                                                                 |               |               |
| Visceral*                                                                                                                                  | 135 (52)      | 131 (67)      |
| Liver                                                                                                                                      | 18 (7)        | 16 (8)        |
| Lymph node only                                                                                                                            | 37 (14)       | 12 (6)        |
| <b>Time from prior chemotherapy ≤3 months, n (%)</b>                                                                                       | 31 (12)       | 8 (4)         |
| <b>Prior therapy regimen, n (%)</b>                                                                                                        |               |               |
| Platinum-based chemotherapy                                                                                                                | 36 (14)       | 88 (45)       |
| Taxane                                                                                                                                     | 17 (7)        | 44 (22)       |
| Tyrosine Kinase Inhibitor                                                                                                                  | 4 (2)         | 16 (8)        |
| Chemoradiation                                                                                                                             | 90 (35)       | 33 (17)       |
| Targeted therapy**                                                                                                                         | 6 (2)         | 37 (19)       |
| Pemetrexed                                                                                                                                 | 18 (7)        | 72 (37)       |
| Other                                                                                                                                      | 40 (15)       | 30 (15)       |
| <b>PD-L1 status in tumor-infiltrating immune cells (Proportion of PD-L1-stained tumor-infiltrating immune cells within the tumor area)</b> |               |               |
| ≥5% of the tumor area                                                                                                                      | 129 (50)      | 56 (29)       |
| <5% of the tumor area                                                                                                                      | 130 (50)      | 80 (41)       |
| Unknown                                                                                                                                    | 0 (0)         | 60 (31)       |

\*Visceral metastases defined as liver, lung, bone, or any nonlymph node or soft tissue metastasis.

\*\* VEGF targeted therapy + TKI



**Supplementary Figure 1.** Differentially expressed genes in response to DDR1 and DDR2 expression changes in mouse bladder cancer models. A. Generation of tumors with enforced expression of DDR1 and controls based on T24 human bladder tumor cells, and NA13 mouse bladder tumor treated with shDDR2 and control scrambles. B and C. Volcano plots depict differential expression of the genes perturbed by DDR1 (B) or DDR2 (C) in murine models. D. Bar chart shows uniquely enriched hallmark gene sets by the up-regulated genes by DDR1 overexpression. E. Bar chart shows uniquely enriched hallmark gene sets by the downregulated genes by DDR2 deletion. F. Common and differentially enriched hallmark gene sets by upregulated genes by DDR1 overexpression and downregulated genes by DDR2 depletion.

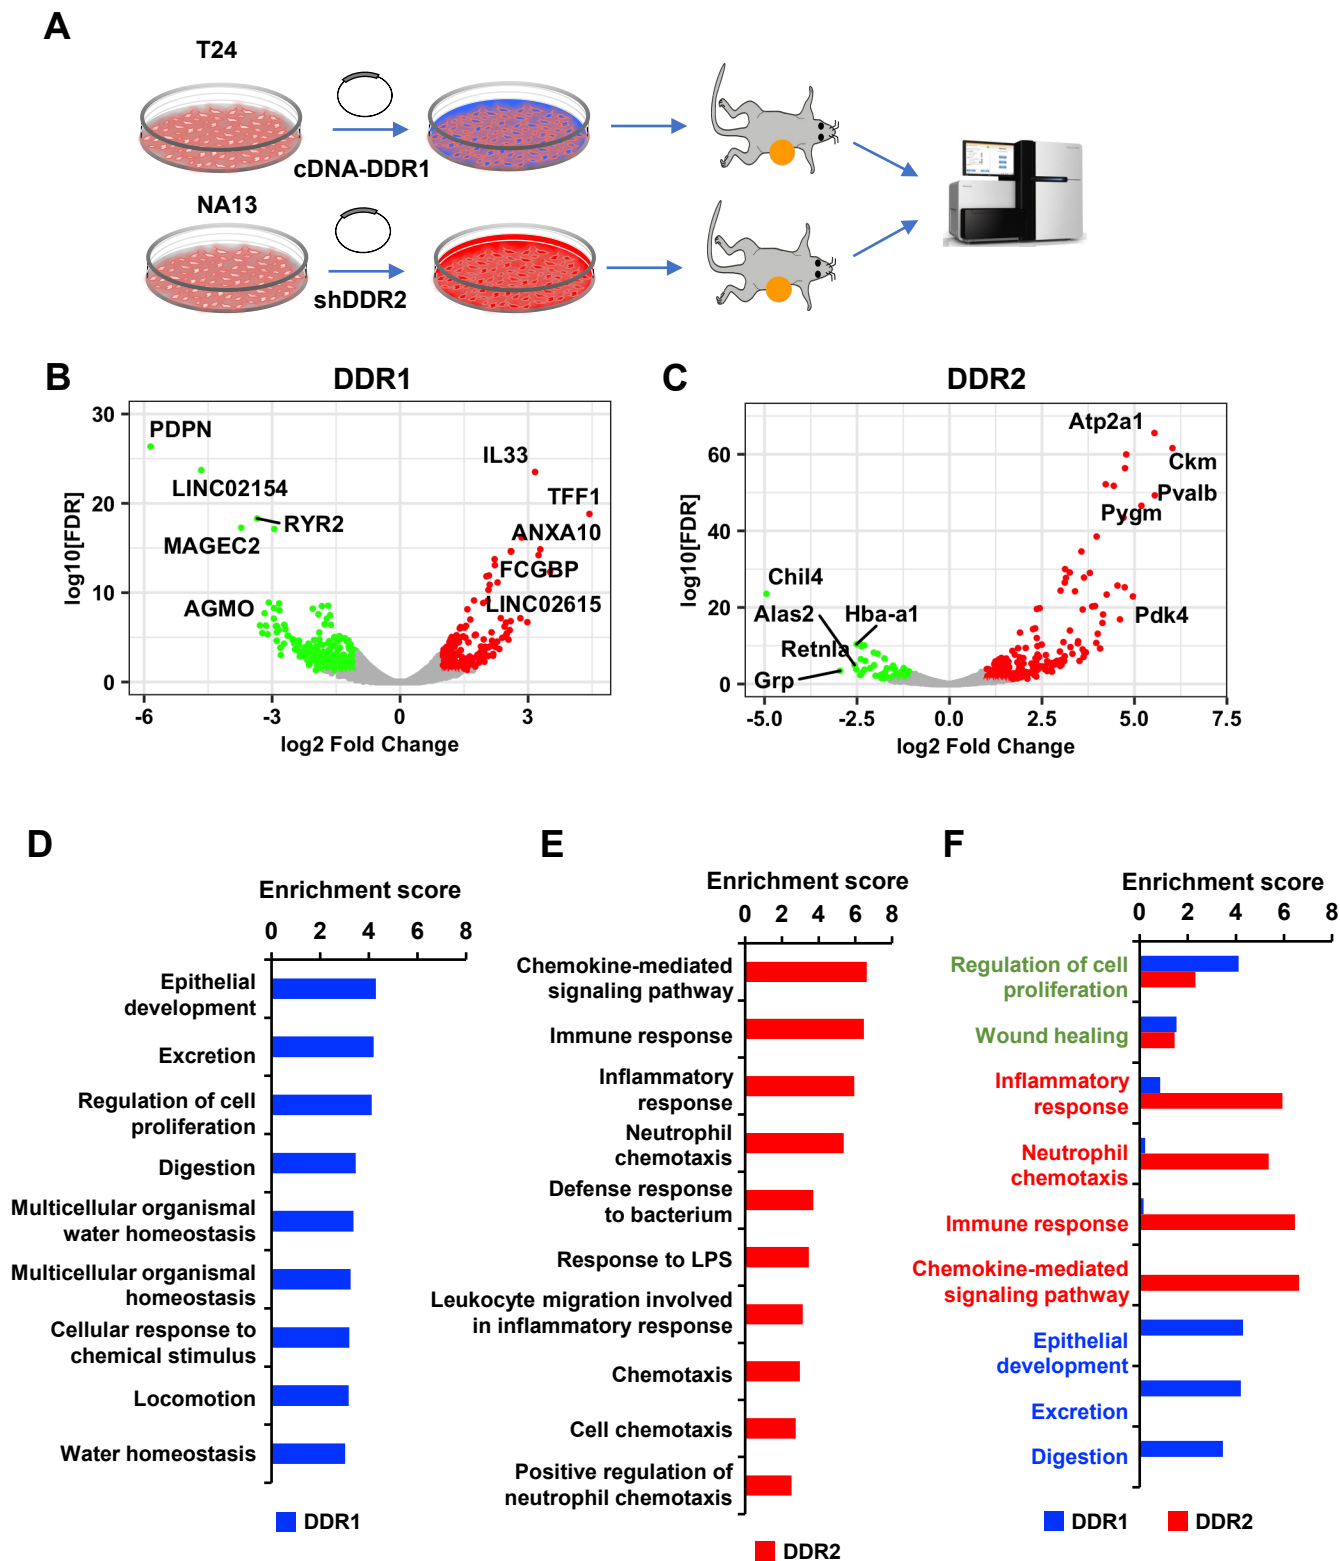

**Supplementary Figure 2.** Development and characterization of DDR gene expression signatures and their scores. A. A flow chart shows the selection process of the differentially expressed genes perturbed by DDR1 or DDR2 in separate models. B. The flow chart continues, showing the functional evaluation process of the top 50 genes from the DDR1 or DDR2 model through pathway analysis and survival analysis.

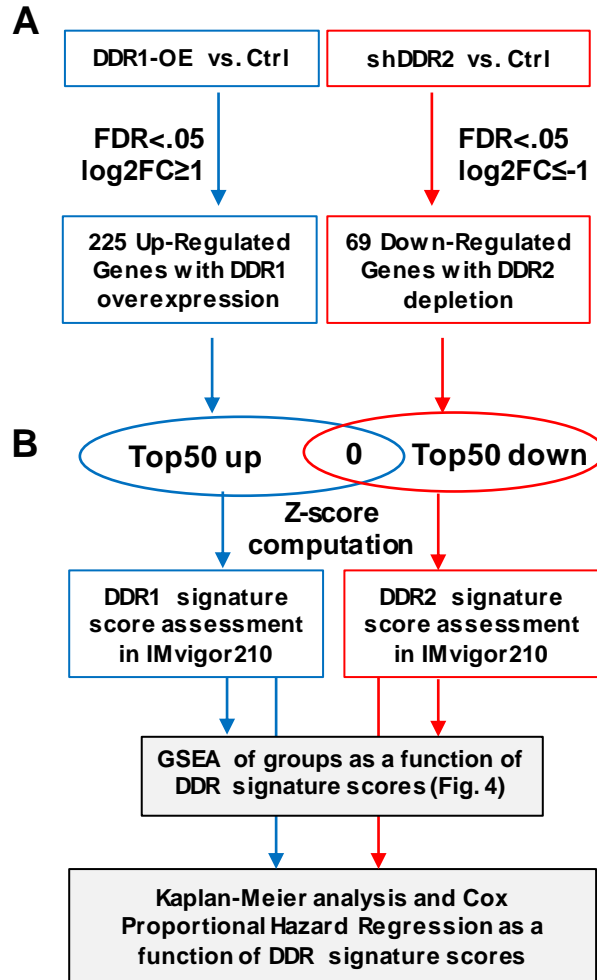

**Supplementary Figure 3.** Survival association of combined DDR1 and DDR2 gene models. Kaplan-Meier curves show survival rate difference between combined DDR gene model score high and low groups.

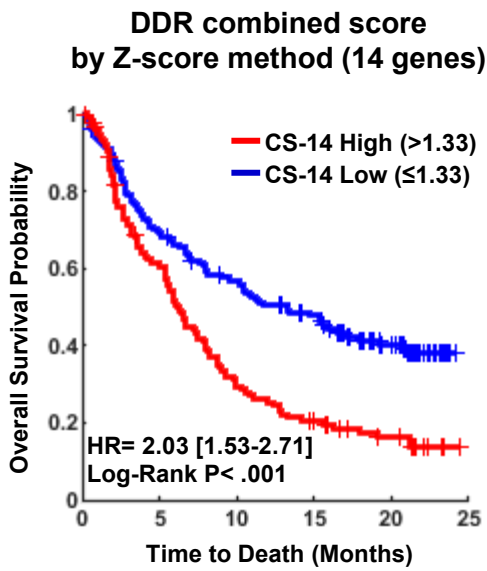

Numbers at risk

|   |     |     |     |    |    |   |
|---|-----|-----|-----|----|----|---|
| ■ | 219 | 149 | 120 | 97 | 53 | 0 |
| ■ | 129 | 74  | 36  | 22 | 13 | 0 |

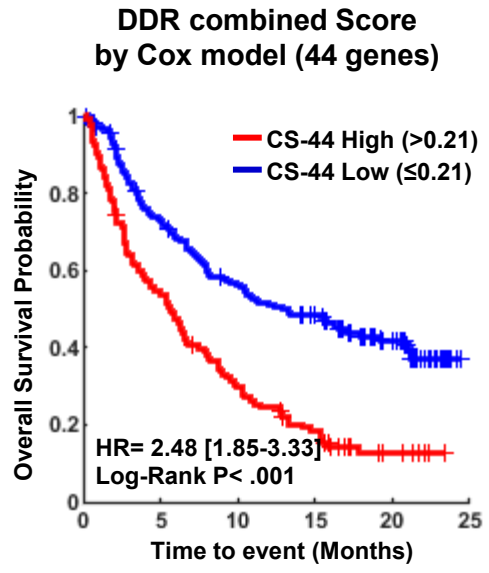

Numbers at risk

|   |     |     |     |    |    |   |
|---|-----|-----|-----|----|----|---|
| ■ | 226 | 158 | 121 | 99 | 60 | 0 |
| ■ | 122 | 65  | 35  | 20 | 6  | 0 |

# Supplementary Figure 4. Survival association of DDR1 or DDR2 gene models in independent cohorts

## Gide cohort (Melanoma)

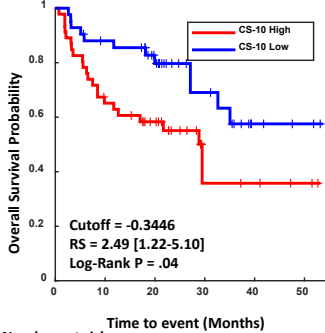

Numbers at risk

|    |    |    |    |   |   |
|----|----|----|----|---|---|
| 47 | 30 | 22 | 6  | 4 | 3 |
| 43 | 36 | 27 | 13 | 4 | 3 |

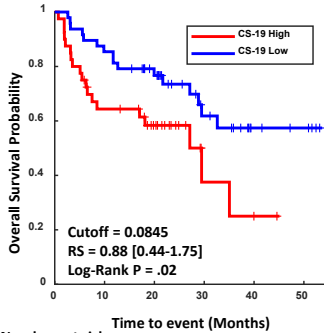

Numbers at risk

|    |    |    |    |   |   |
|----|----|----|----|---|---|
| 41 | 24 | 17 | 4  | 2 | 2 |
| 49 | 42 | 32 | 15 | 6 | 4 |

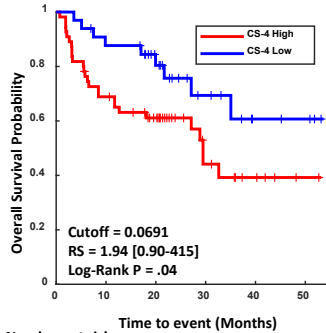

Numbers at risk

|    |    |    |    |   |   |
|----|----|----|----|---|---|
| 55 | 36 | 27 | 9  | 4 | 2 |
| 35 | 30 | 22 | 10 | 4 | 4 |

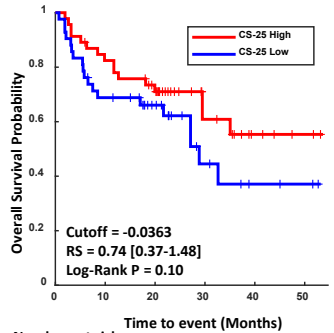

Numbers at risk

|    |    |    |    |   |   |
|----|----|----|----|---|---|
| 46 | 38 | 30 | 12 | 5 | 3 |
| 44 | 28 | 19 | 7  | 3 | 3 |

## Hugo cohort (Melanoma)

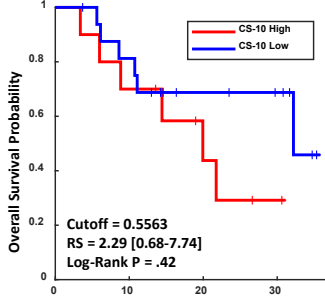

Numbers at risk

|    |    |   |   |
|----|----|---|---|
| 10 | 7  | 3 | 1 |
| 18 | 14 | 7 | 6 |

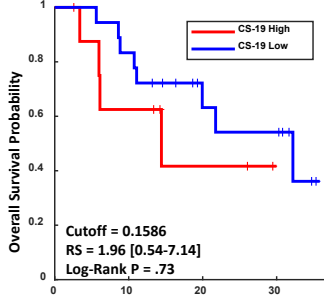

Numbers at risk

|    |    |   |   |
|----|----|---|---|
| 10 | 6  | 3 | 1 |
| 18 | 15 | 7 | 6 |

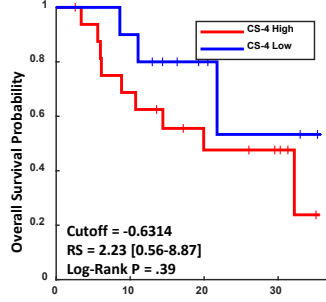

Numbers at risk

|    |    |   |   |
|----|----|---|---|
| 18 | 12 | 7 | 5 |
| 10 | 9  | 3 | 2 |

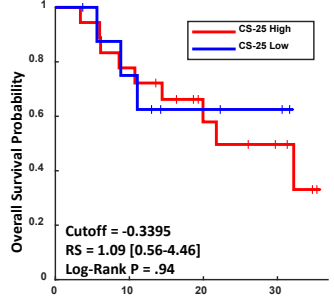

Numbers at risk

|    |    |   |   |
|----|----|---|---|
| 19 | 15 | 8 | 5 |
| 9  | 6  | 2 | 2 |

## Riaz cohort (Melanoma)

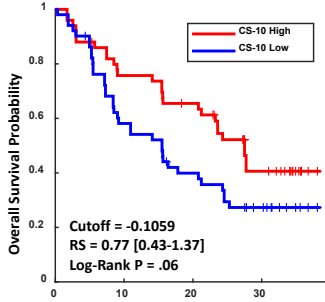

Numbers at risk

|    |    |    |    |
|----|----|----|----|
| 50 | 37 | 31 | 13 |
| 51 | 29 | 19 | 8  |

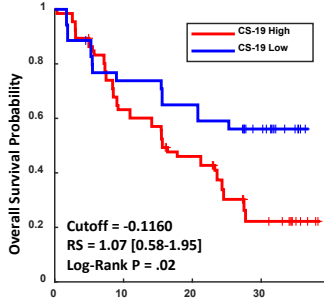

Numbers at risk

|    |    |    |    |
|----|----|----|----|
| 66 | 41 | 28 | 10 |
| 35 | 25 | 22 | 11 |

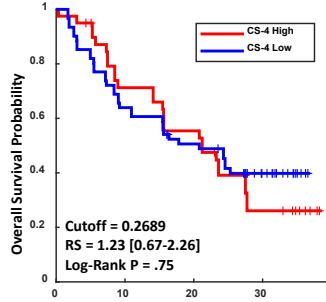

Numbers at risk

|    |    |    |    |
|----|----|----|----|
| 40 | 27 | 21 | 8  |
| 61 | 39 | 29 | 13 |

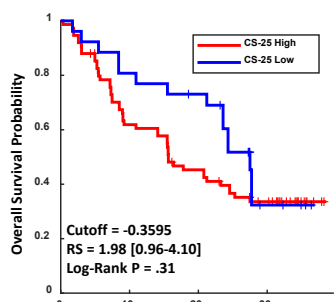

Numbers at risk

|    |    |    |    |
|----|----|----|----|
| 75 | 45 | 32 | 18 |
| 26 | 21 | 18 | 3  |

**Supplementary Figure 4.** Survival association of DDR1 or DDR2 gene models in independent cohorts (cont.)

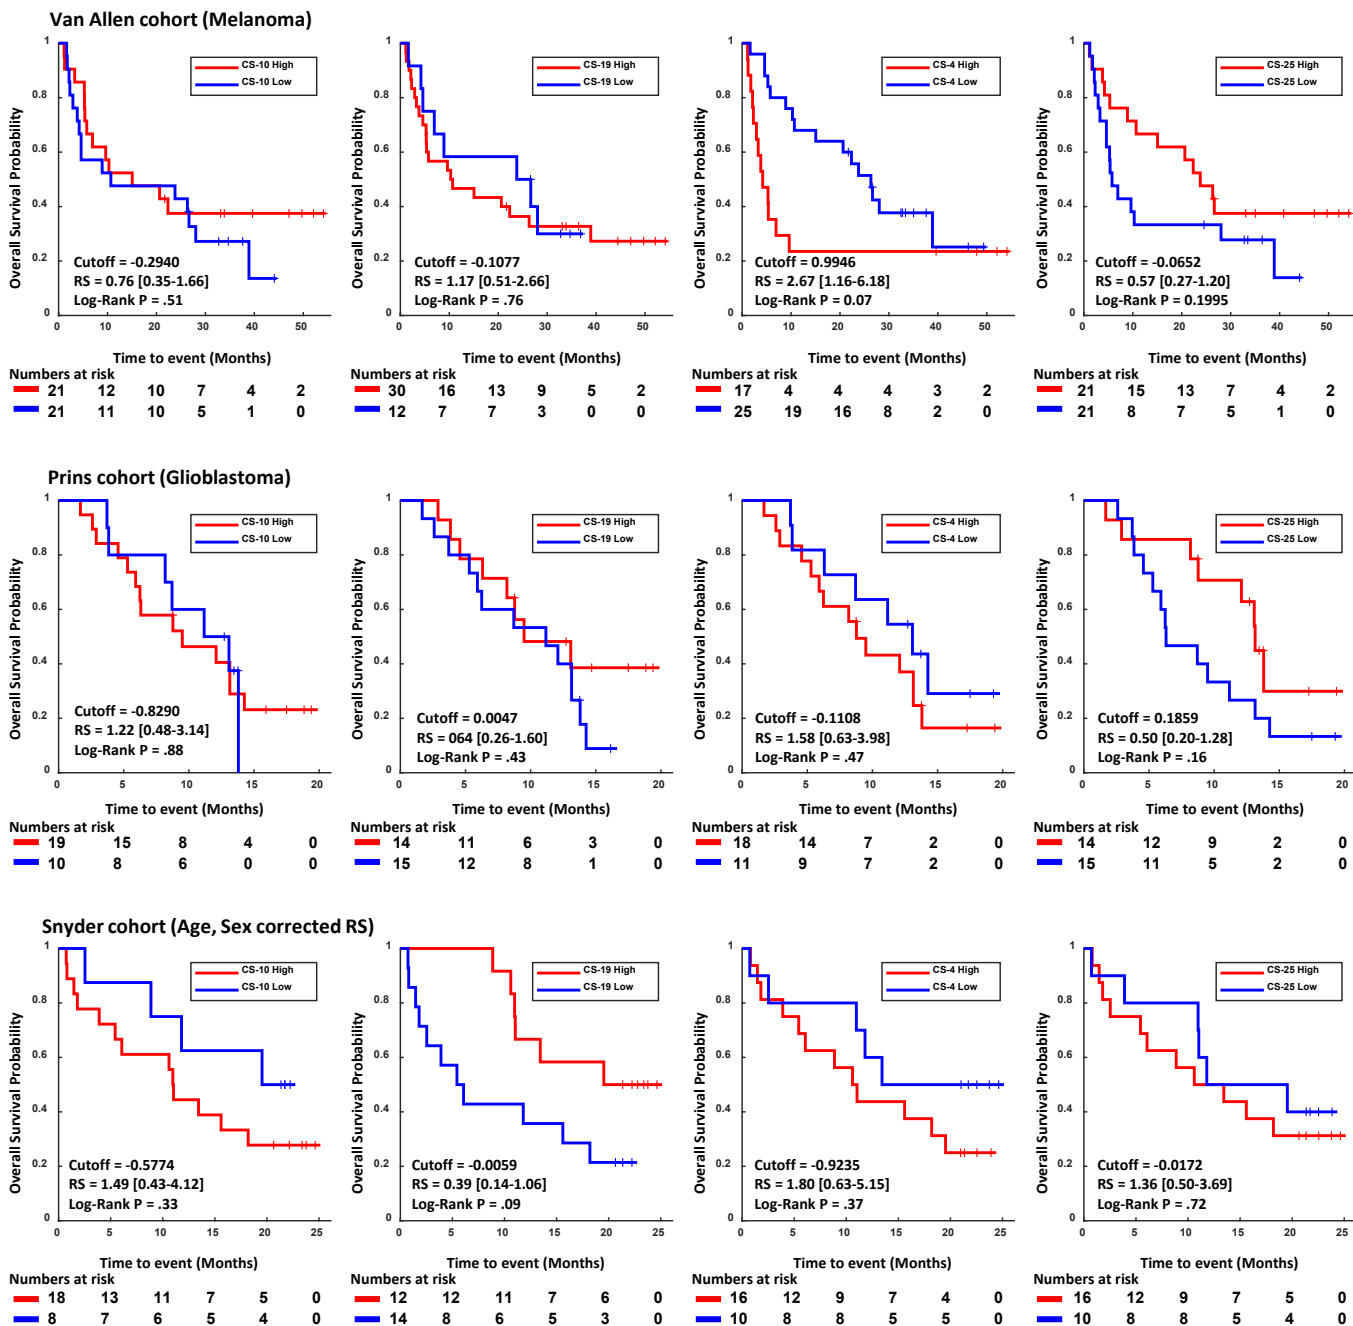

# Supplementary Figure 5. DDR1/2 expression versus PD-L1 expression

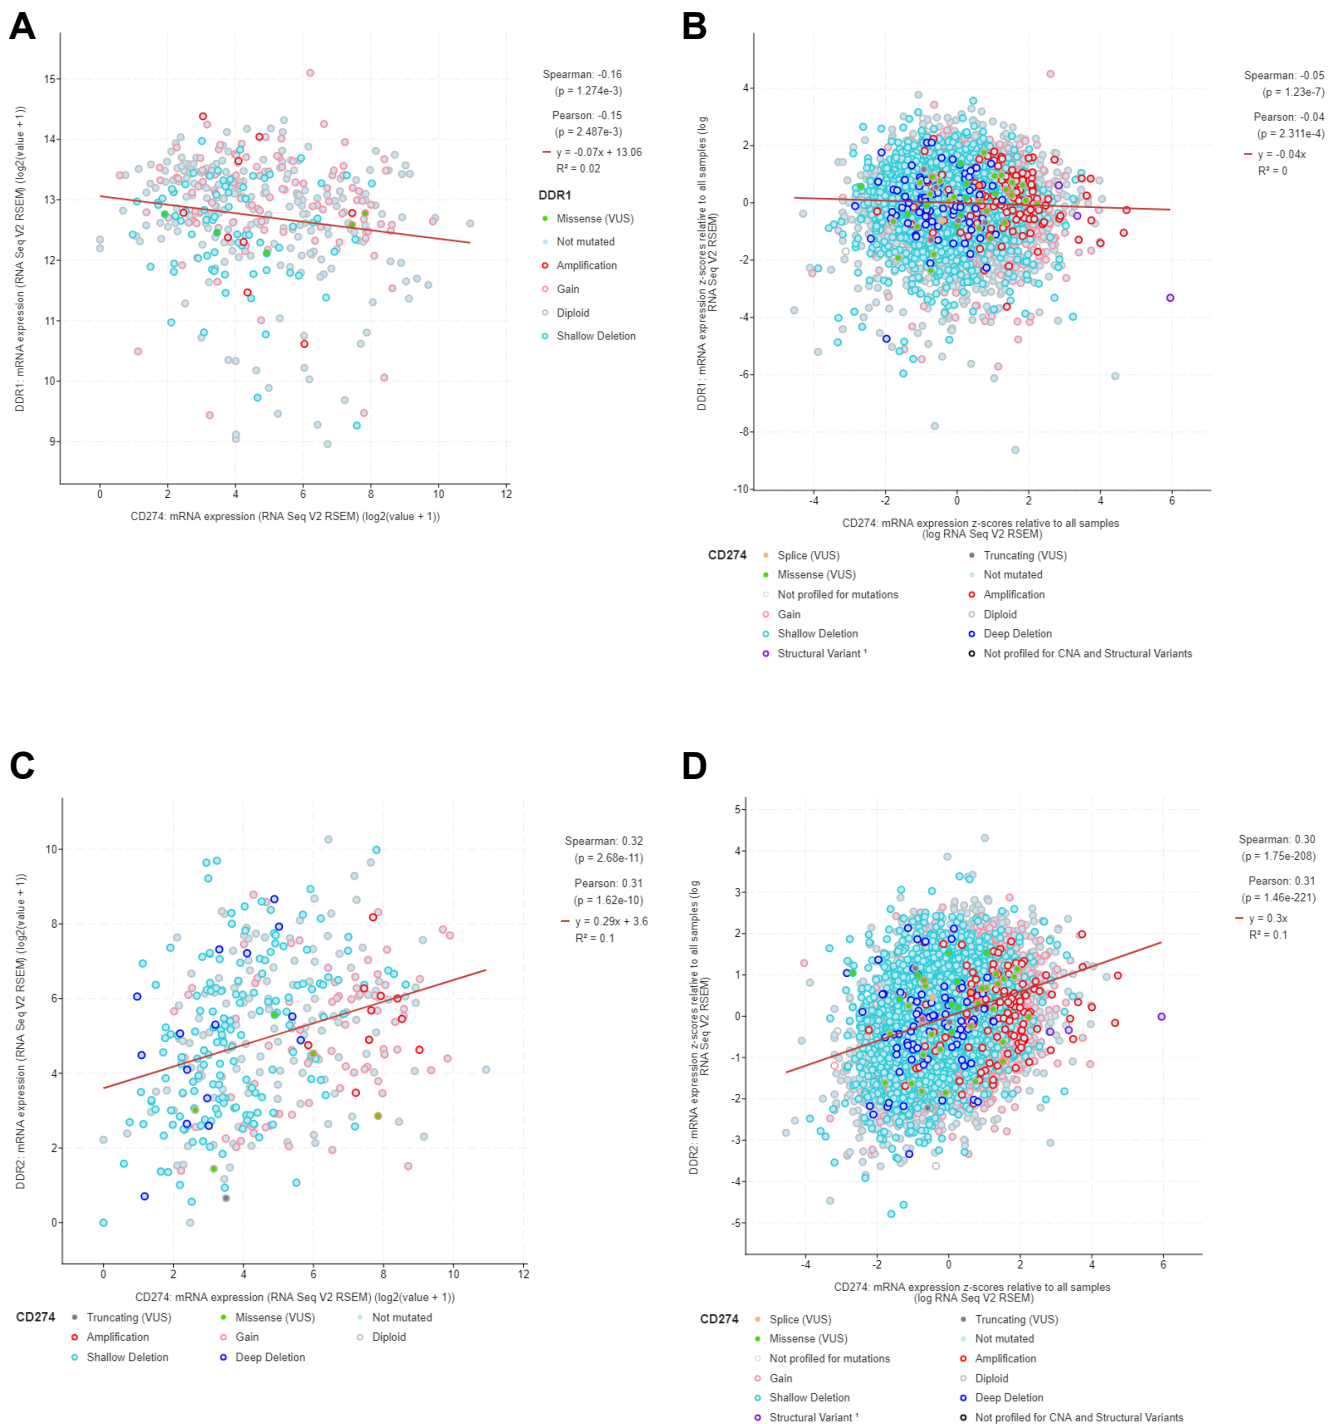

# Supplementary Figure 6. DDR1/2 expression versus HLA mutations

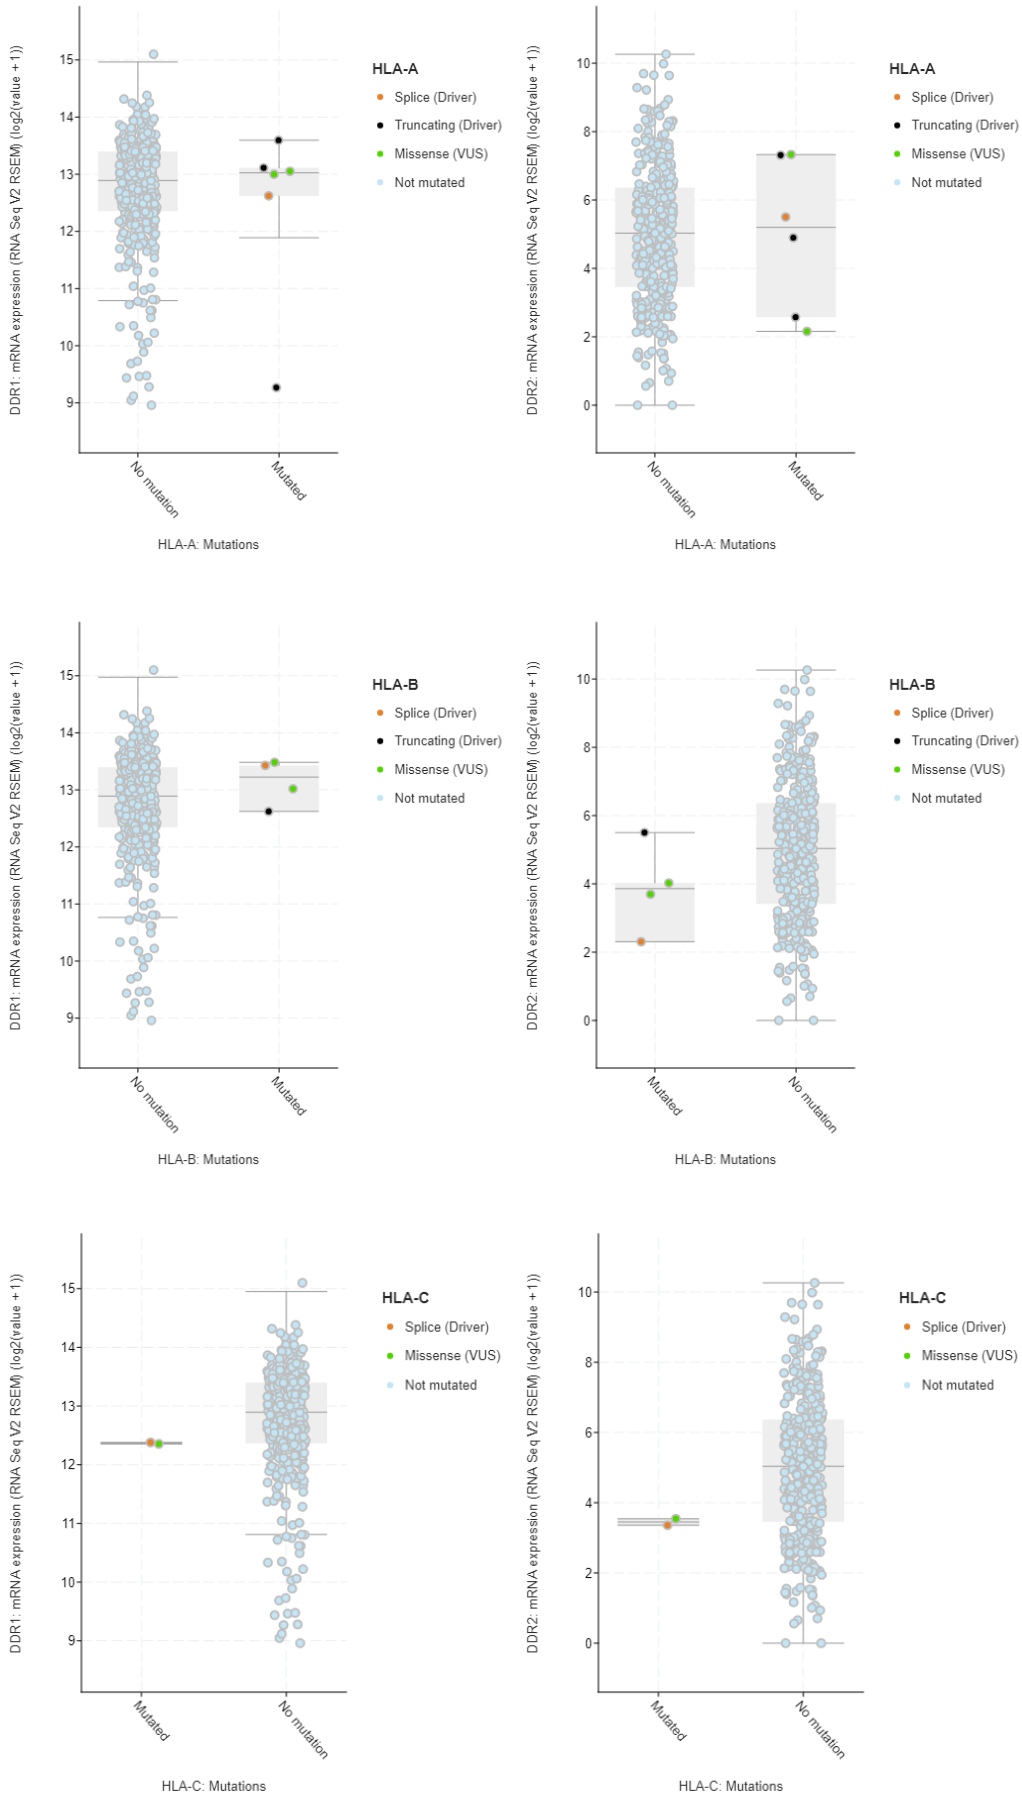

# Supplementary Figure 7. DDR1/2 expression versus HLA mutations (Pan-cancer)

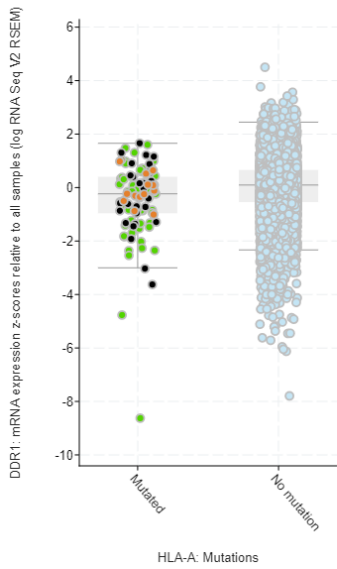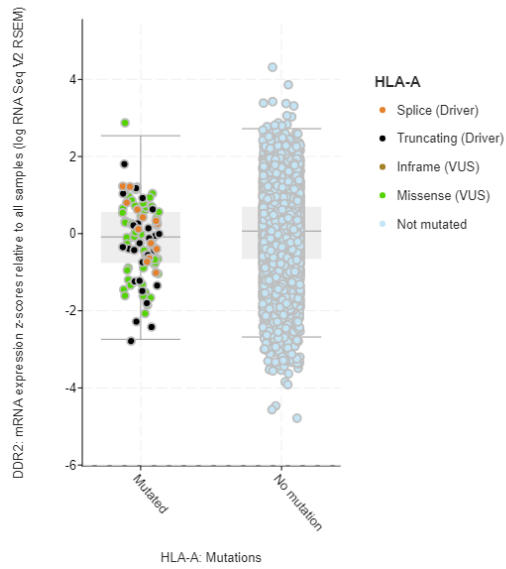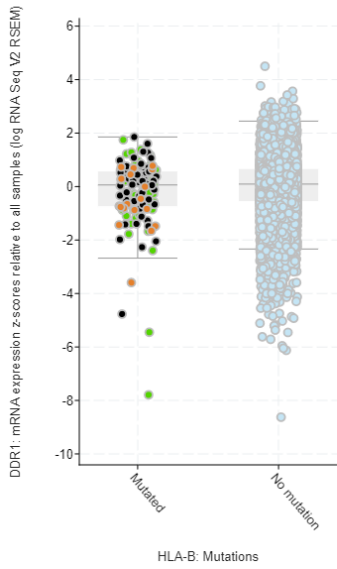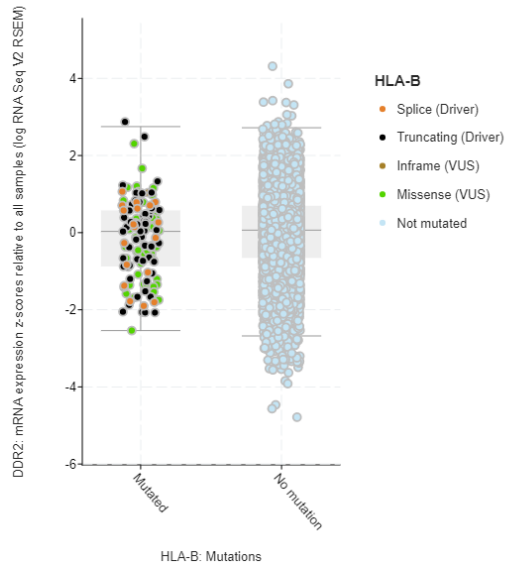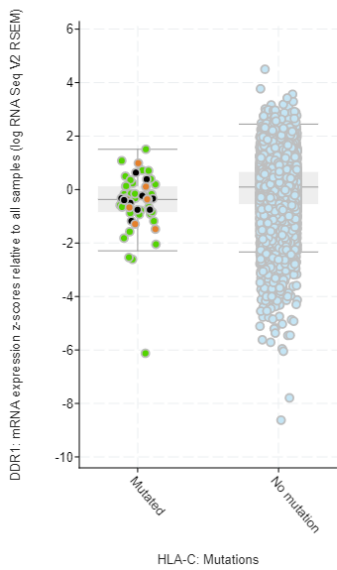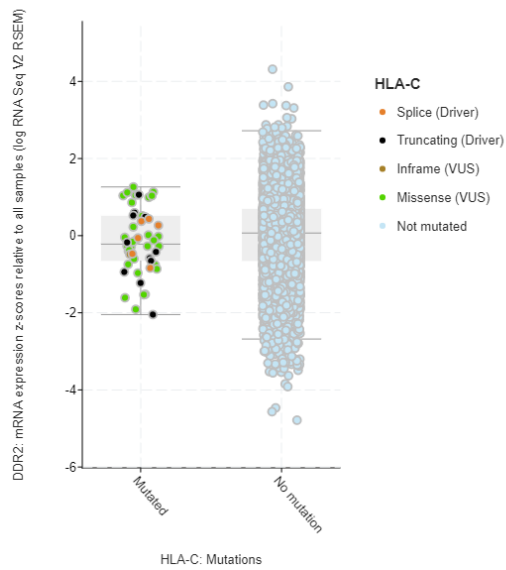



# Supplementary Figure 8. DDR1/2 expression versus TMB

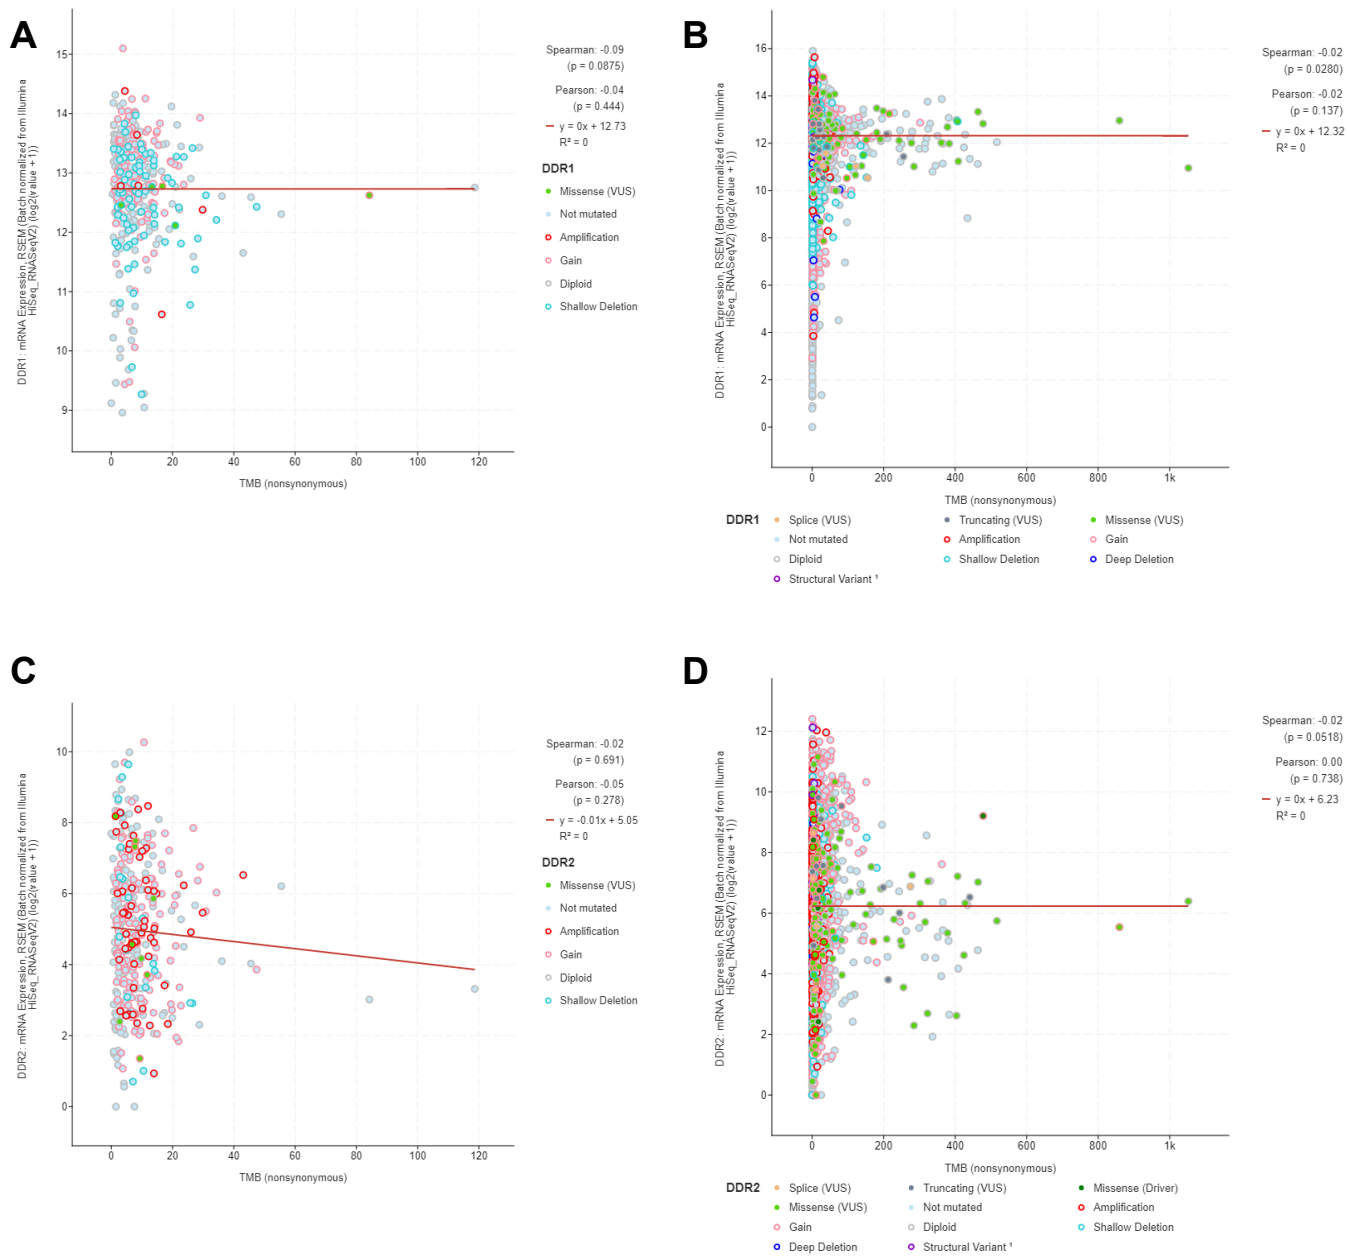

Supplement: djac140_supplementary_data.pdf [file djac140_supplementary_data.pdf]
